1 **CoRNeA: A pipeline to decrypt the inter protein interfaces from amino acid sequence**  
2 **information**

3 Kriti Chopra<sup>1</sup>, Kaushal Sharma<sup>2</sup>, Ajit Kembavi<sup>2</sup>, Shekhar C. Mande<sup>3</sup> and Radha Chauhan<sup>1\*</sup>

4 1- National Centre for Cell Science, Pune.

5 2- Inter University Centre for Astronomy and Astrophysics, Pune

6 3- Council of Scientific and Industrial Research (CSIR), New Delhi

7 **Abstract**

8 **Motivation**

9 Decrypting the interface residues of the protein complexes provide insight into the functions  
10 of the proteins and hence the overall cellular machinery. Computational methods have been  
11 devised in the past to predict the interface residues using amino acid sequence information  
12 but all these methods have been majorly applied to predict for prokaryotic protein complexes.  
13 Since the composition and rate of evolution of the primary sequence is different between  
14 prokaryotes and eukaryotes, it is important to develop a method specifically for eukaryotic  
15 complexes.

16 **Results**

17 Here we report a new hybrid pipeline for the prediction of protein-protein interaction  
18 interfaces from the amino acid sequence information which is based on the framework of co-  
19 evolution, machine learning (random forest) and network analysis named CoRNeA trained  
20 specifically on eukaryotic protein complexes. We use conservation, structural and contact  
21 potential as major group of features to train the random forest classifier. We also incorporate  
22 the intra contact information of the individual proteins to eliminate false positives from the  
23 predictions keeping in mind that the amino acid sequence also holds information for its own  
24 folding and not only the interface propensities. Our prediction on example datasets shows that  
25 CoRNeA not only enhances the prediction of true interface residues but also reduces false  
26 positive rates significantly.

27

28

29

## 30 **Introduction**

31 The biological machinery performs its cellular functions when its basic units such as DNA,  
32 RNA and proteins interact with each other. To understand the overall functioning of the cell,  
33 it is important to delineate the pairwise interactions of these basic units such as DNA-protein,  
34 RNA-protein and protein-protein. Of these, the inter protein interactions that a cell possesses  
35 play a very crucial role in understanding the various cellular processes and hence also their  
36 functioning or malfunctioning in the disease models. There are various experimental methods  
37 known for examining these interactions such as yeast two hybrid (Y2H)(Godwin *et al.* 2000),  
38 co-immunoprecipitation (co-IP)(Masters 2004), mass spectrometry (Sobott and Robinson  
39 2002) etc. which are labor, cost and time intensive. Deciphering the PPI (Protein-Protein  
40 Interaction) at the highest resolution through x-ray crystallography or cryo-electron  
41 microscopy methods is even more challenging due to their intrinsic technical difficulties.

42 A number of *in-silico* methods have been described earlier to predict these PPI based on  
43 available data such as 1) homology 2) machine learning and 3) co-evolution based.  
44 Homology based methods are generally applied when confident homologs of both the  
45 interacting proteins are available, followed by protein-protein docking for visualizing the  
46 protein interaction interfaces such as PredUS (Zhang *et al.* 2011), PS-HomPPI (Xue, Dobbs  
47 and Honavar 2011), PriSE (Honavar *et al.* 2012) etc. The machine learning (ML) methods  
48 which have been described till date are either structure based or sequence based. The  
49 structure-based ML methods (SPPIDER(Porollo and Meller 2007), PINUP(Liang *et al.*  
50 2006), PAIRpred(Afsar Minhas, Geiss and Ben-Hur 2014), PIER(Kufareva *et al.* 2007),  
51 ProMate(Neuvirth, Raz and Schreiber 2004), Cons-PPISP(Chen and Zhou 2005), Meta-  
52 PPISP(Qin and Zhou 2007), CPort(de Vries and Bonvin 2011), WHISCY(Vries, Dijk and  
53 Bonvin 2006), InterProSurf(Negi, S.S.; Catherine, H.S.; Oezguen, N.; Power 2007),  
54 VORFFIP(Segura, Jones and Fernandez-Fuentes 2011), eFindSite(Maheshwari and Brylinski  
55 2016) etc.) require three-dimensional information of the interacting proteins which can be  
56 either experimental or homology driven to incorporate the geometrical complementarities of  
57 amino acids as training features. Only a few sequence-based ML methods are known such as  
58 BIPSPI (Ruben Sanchez-Garcia *et al.* 2019), PSIVER (Murakami and Mizuguchi 2010), and  
59 ComplexContact (Zeng *et al.* 2018) which derive features based on conservation,  
60 physicochemical properties of amino acids etc. However, the predictability of these ML  
61 methods is affected by the prevalence of high false positive rates due to limitation of small

62 number of protein-complex structures in the protein structure database (PDB) which restrict  
63 the training of these machine learning algorithms in terms of variability.

64 The third class, co-evolution-based methods which were originally formulated to predict  
65 contact forming residues within a single protein and therefore for the prediction of the  
66 structure of the protein. These methods have been extrapolated to also predict the inter-  
67 protein interaction interfaces based on the multiple sequence alignments (MSA) of the  
68 proteins. Concatenating the MSA of an interacting pair and using the same statistical  
69 formulae as described for intra pairs have been implemented to predict the co-evolving  
70 contact forming pairs by various methods such as DCA(Weigt *et al.* 2009),  
71 EvComplex(Green *et al.* 2014) etc. However, there are two main caveats known for these  
72 methods. Firstly, they use different downstream methods to filter out their results by using  
73 homology-based models and docking predictions in combination with their results. Secondly,  
74 most of these methods have been tested on prokaryotic proteins and have a limitation of  
75 predicting only for a maximum combined length of 1500 residues per protein pair. Almost all  
76 co-evolution-based methods have been only tested on prokaryotic lineage probably due to  
77 availability of huge number of sequences for generating variable multiple sequence  
78 alignments. Recently a hybrid method (co-evolution and machine learning based-  
79 ComplexContact (Zeng *et al.* 2018)) was reported, however, its performance was also the  
80 tested on prokaryotic datasets. Overall these methods could not perform with similar  
81 accuracy when applied to eukaryotic complexes.

82 The low predictability of these methods for eukaryotic protein complexes can be attributed to  
83 the differences in the rate of evolution of the proteins in the two lineages. It has been reported  
84 that there is a difference in the composition of type of amino acids present in prokaryotic  
85 versus eukaryotic proteins and also in the radius of gyration and planarity in the interaction  
86 interface. Since the eukaryotic proteins are not exclusive to only one set of function, it has  
87 been perceived that most of the eukaryotic protein interactions are transient, having smaller  
88 interaction hotspot zones and have more planar binding sites consisting of more polar and  
89 aromatic residues. These properties of the eukaryotic protein interactions make them essential  
90 part of cell signaling pathways (Goncearenco *et al.* 2015).

91 Hence to delineate the vast PPI network of eukaryote lineage, e.g. human protein interaction  
92 network, which contains about 1,50,000 interactions (with only about 10% of known  
93 structures of these protein complexes)(Rodriguez-Rivas *et al.* 2016), it is important to

94 develop a method specific for eukaryotic predictions. In this report, we present a new hybrid  
95 pipeline based on the framework of co-evolution, random forest (ML method) and network  
96 analysis (CoRNeA) for predicting the pairwise residues of the PPI interface from the protein  
97 sequence information of two interacting proteins (Figure 1). We also developed a new hybrid  
98 method for calculating co-evolving positions in the interacting pairs based on mutual  
99 information and Statistical Coupling analysis (SCA)(Lockless 2002). Owing to high signal to  
100 noise ratio, this method in consensus with the other co-evolution-based method does not  
101 perform well independently to extract the precise interacting pair of residues specially for  
102 eukaryotic proteins. Hence, we used this method as one of the features for machine learning  
103 pipeline. The other features derived for the random forest classifier are based on the  
104 physicochemical properties of the amino acids such as charge, size and hydrophobe  
105 compatibility, secondary structure information and relative solvent accessibility, which were  
106 also derived using amino acid sequence information. To include the energetics of  
107 interactions, contact potentials were also included as features. Similar to other machine  
108 learning classifiers, our pipeline also predicted a number of false positives. In order to reduce  
109 them we employed network analysis by incorporating the intra contact information to  
110 generate residual networks for PPI interface. In summary, the major highlight of this method  
111 as compared to other methods developed on the similar lines are 1) use of eukaryotic protein  
112 structure database for training the classifier. 2) use of co-evolution information as  
113 conservation-based feature. 3) use of intra contact pairs to eliminate false positive pairs  
114 through network analysis. Thus, we present a holistic approach to this complex problem of  
115 identifying pair of residues forming the interaction interface in the heterodimers from the  
116 amino acid sequence information.

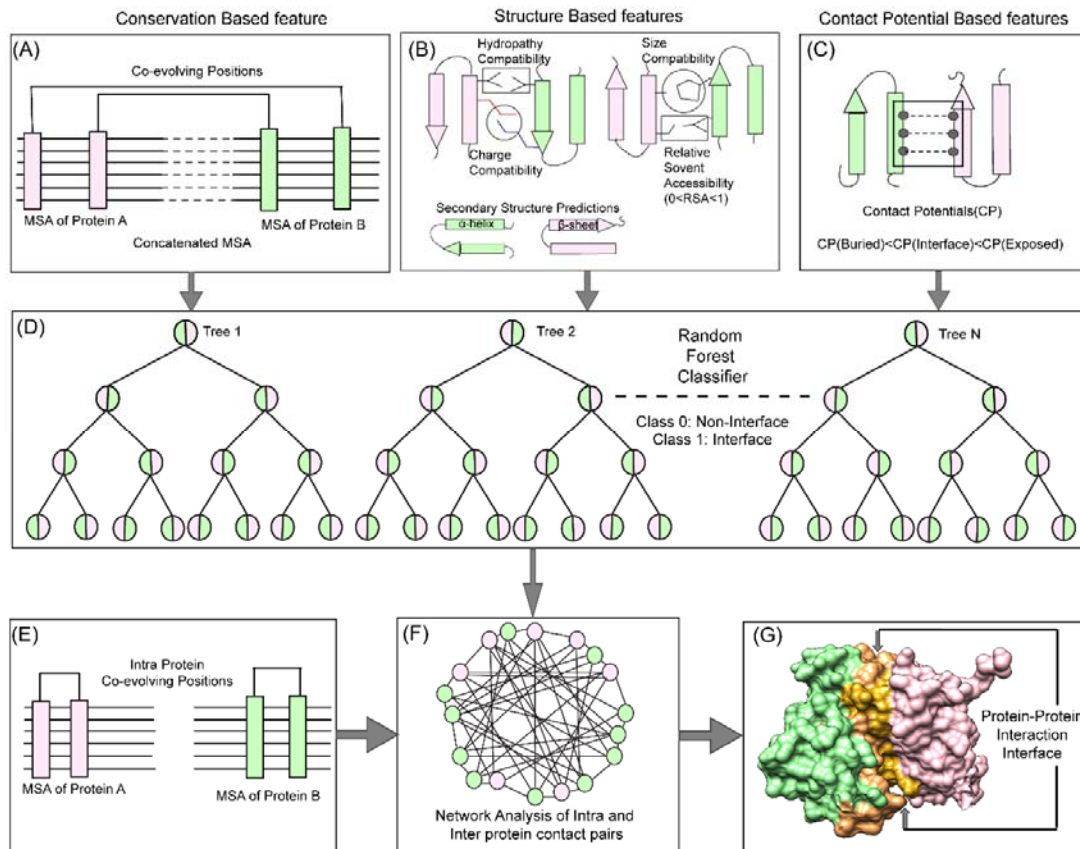

117

118 **Figure 1: CoRNéA pipeline for predicting co-evolving contact forming residues in**  
119 **interacting pair of proteins.** The method for predicting the protein-protein interaction  
120 interface consists of three levels. The top panel depicts the features used for machine learning  
121 pipeline. (A). Conservation based (coevolution) (B) Structure based (Charge, Size,  
122 Hydropathy, Secondary structure and Relative solvent accessibility) and (C) contact  
123 potential- based features (both for buried and exposed residues). (D) Random forest  
124 classification where pairwise values for both proteins are considered depicted in half green  
125 and pink circles for binary classification (Class 1: protein interface, Class 0: non interface).  
126 The bottom panel depicts the application of network analysis by combining intra and intra  
127 protein contact predictions for reducing the false positives. (E) Prediction of intra contacts of  
128 Protein A and B. (F) Combined network analysis of inter and intra predicted contacts. (G)  
129 Interface prediction for PDB ID: 1H9D.

## 130 2. Methodology

131 The overall pipeline to predict pairwise contact forming residues from sequence derived data  
132 can be divided into three distinct parts as depicted in figure 1. The first step is to generate  
133 pairwise features (conservation, structural and contact potential based) from amino acid  
134 sequence of the two interacting proteins. The second step is to feed these pairwise features in  
135 a random forest classifier and hence optimize its various hyperparameters to obtain the best  
136 evaluation statistics. The third step is to combine the intra protein contact forming residues

137 from co-evolution-based method and inter-protein contact forming residues from random  
138 forest classifier and perform network analysis to predict the exclusive pair of residues  
139 forming the interface of the two interacting proteins.

## 140 **2.1 Datasets**

141 The Affinity Database version 2.0(Kastritis *et al.* 2011) was used to select the protein  
142 complex structures for training. The amino acid sequences of the complex structures were  
143 extracted from [www.rcsb.org](http://www.rcsb.org) and used as query to search for homologs. PHMMER(Finn *et al.*  
144 *et al.* 2015) was used to fetch maximum homologs of the query sequence which were then  
145 manually curated to remove redundant sequences. The sequences having less than 25%  
146 sequence identity were removed. The final dataset for each of the interacting protein  
147 consisted of identical species.

## 148 **2.2 Multiple Sequence Alignments**

149 The datasets for each interacting pair of proteins having identical species were subjected to  
150 structure guided multiple sequence alignments using PROMALS3D(Pei, Kim and Grishin  
151 2008). The alignments were then analyzed/edited in JalView(Waterhouse *et al.* 2009) and  
152 then concatenated (Last residue of Protein A followed by first residue of Protein B) in R  
153 using package seqinr(Gouy *et al.* 1984). These concatenated MSA datasets were used for co-  
154 evolution matrix calculations.

## 155 **2.3 Features**

156 For calculating sequence-based features, the sequences were extracted from the protein  
157 databank ([www.rcsb.org](http://www.rcsb.org)) and any missing regions reported in the structure were removed  
158 from the sequence data. All the features for training and testing were compiled as all versus  
159 all residue pairs between sequence of the interacting pair of protein (Protein A and Protein B)  
160 in form of MXN matrix (M=length of Protein A and N= length of Protein B). All the feature  
161 values were scaled between 0 and 1. (Figure S1)

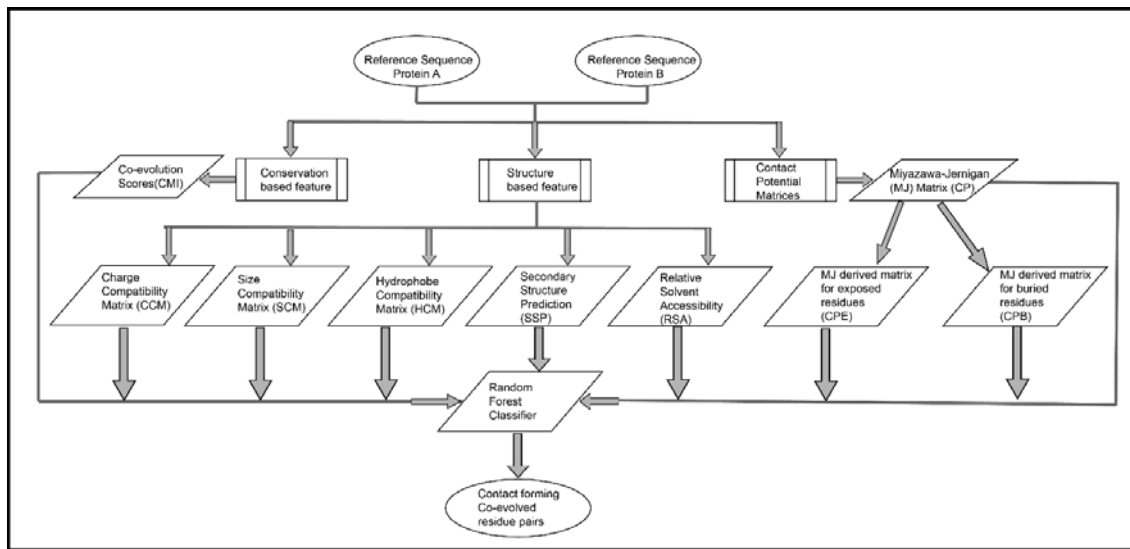

162

163 **Figure S1: Flowchart depicting the feature generation for predicting pair of protein-**  
164 **protein interaction interface residues**

### 165 *2.3.1 Evolution based features*

#### 166 *Co-evolution matrices (CMI)*

167 The co-evolution scores between the pair of residues of the interacting proteins were  
168 calculated based on Conditional Mutual Information as depicted in Figure 2. The  
169 concatenated MSA's were subjected to perturbation experiment similar to that used in  
170 Statistical Coupling Analysis (SCA)(Lockless 2002). The amino acids were converted from  
171 alphabetic nomenclature to numeric for the ease of calculation (table S1). For each column in  
172 the MSA of Protein A and B, a condition pertaining to presence of one of the 20 amino acid  
173 was given to subset the concatenated MSA. For example, position 1 in concatenated MSA, a  
174 condition given to subset the MSA for the presence of valine (V). A subset of sequences was  
175 selected which had only valine at position 1 of MSA. Frequencies of the amino acid present  
176 in the subset were calculated and subjected to the conditional mutual information  
177 formula(Wyner 1978). It resulted in 20 such conditions for each column in the MSA of  
178 Protein A which were summed up to obtain the final co-evolution MXN matrix.



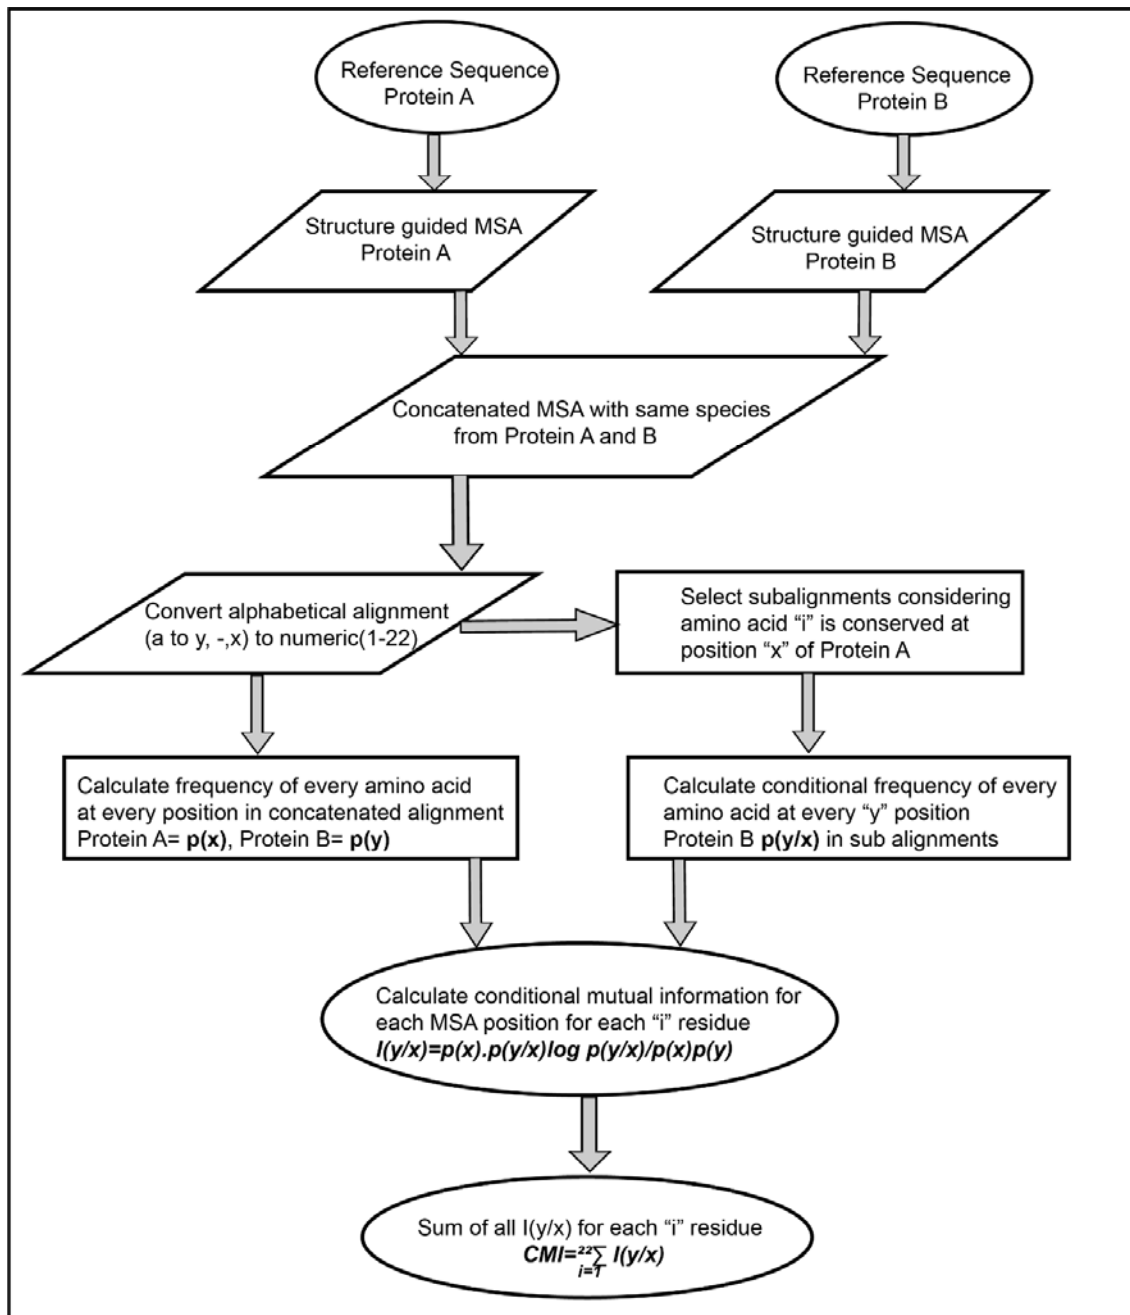

179

180 **Figure 2: Flow chart representing algorithm for calculating inter protein co-evolving**  
 181 **positions from multiple sequence alignments.**

182 **2.3.2 Structure based features**

183 **Charge, Hydrophobe and size compatibility matrices**

184 The physicochemical properties of the residue can be derived from sequence information but  
 185 to derive pair wise values for these properties, we employed the 20X20 residue matrices  
 186 which were described to aid in *ab initio* modelling of single protein(Biro 2006). These



187 matrices were used to derive an all versus all residue matrix (MXN) for the interacting pair of  
188 proteins as features i.e. hydrophathy compatibility (HCM), charge compatibility (CCM) and  
189 size compatibility matrices (SCM)

#### 190 ***Relative Solvent Accessibility (RSA)***

191 To calculate the pairwise RSA values, RSA of independent proteins were calculated using  
192 SPIDER3(Heffernan *et al.* 2017) and multiplied to form an all versus all (MXN) matrix of the  
193 pair of interacting proteins.

#### 194 ***Secondary Structure Predictions (SSP)***

195 The secondary structure of the proteins was predicted using PSIPRED(Jones 1999) and all  
196 residues were assigned numbers (i.e. 1=  $\alpha$ -helix, 2= $\beta$ -sheet and 3=l-loop). A simple  
197 multiplication and scaling of these numbers between 0 and 1 would yield in a combination  
198 where  $\alpha$ -helix to  $\alpha$ -helix instance will be ranked lowest. To avoid this mis scaling, the  
199 training dataset was inspected for the nature of residue-residue combinations in terms of  
200 secondary structures and the 6 possible combinations (i.e.  $\alpha$ - $\alpha$ ,  $\alpha$ - $\beta$ ,  $\alpha$ -l,  $\beta$ - $\beta$ ,  $\beta$ -l and l-l) were  
201 ranked in order of occurrence. These values were then used as standard to fill in all MXN  
202 matrices of the two interacting proteins.

#### 203 ***2.3.3. Contact Potential based features***

204 Three different approximations of contact potentials were used to generate contact potential-  
205 based features. The first approximation was the original matrix (MJ matrix) (Miyazawa and  
206 Jernigan 1996) where the effective inter-residue contact energies for all amino acid pairs  
207 were calculated based on statistical analysis of protein structures. The other two  
208 approximations were derived from the MJ matrix, where a 2-body correction was applied on  
209 this matrix to generate two separate matrices (Zeng, Liu and Zheng 2012). One of them was  
210 specific for capturing the interactions between exposed residues and the other one for buried  
211 residues. Thus, all three possible combinations were used to derive three contact potential  
212 (MXN) matrices namely, **CP**: original MJ matrix, **CPE**: MJ matrix derived for exposed  
213 residues and **CPB**: MJ matrix derived for buried residues, for the pair of interacting proteins.

#### 214 ***2.4. Environment features***

215 To include residue environment information for training the machine learning algorithm, a  
216 kernel matrix of size 5\*5 was defined and convolved over the nine feature matrices as

217 described above. The convoluted features were generated by using OpenImageR  
218 (<https://github.com/mlampros/OpenImageR>) package in R and the size of the matrices were  
219 kept same to avoid any loss of information. Hence, 18 feature matrices were used for each  
220 pair of interacting protein for training the random forest classifier.

### 221 ***2.5 Interface residue labelling***

222 The interface residues for the protein complexes were extracted using PISA(Krissinel and  
223 Henrick 2007). The number of residue pairs present in the interface (500 pairs for 42  
224 complexes) was far less than all possible residues pairs of the two interacting proteins  
225 (20,00,000 for 42 complexes). To increase the search space and take into consideration the  
226 environment of the contact forming residues, a distance cut off of 10Å was used to search for  
227 possible pair of residues flanking -2 to +2 positions of the interface residues extracted from  
228 PISA. This yielded ten times more positive labels (5000 pairs for 42 complexes) for training  
229 the classifier.

### 230 ***2.6 Data Imbalance Problem***

231 Although increasing the search space as explained above yielded 10 times more datapoints,  
232 still the complete protein complex database exhibited highly imbalance data. 5000 pairs were  
233 labelled as positive out of the total 20,00,000 pairs. In order to address this imbalance class  
234 problem, the majority class which was the negative data labels (non-interface residues pairs)  
235 was down sampled. A number of ratios for negative to positive samples were tested  
236 iteratively (e.g. 2:1, 5:1, 10:1 and 20:1) and best evaluation statistics were obtained when the  
237 negative sample size was five times that of positive samples (5:1). This was used as training  
238 set for the supervised classification model.

### 239 ***2.7 Random Forest Classifier***

240 The random forest classifier was trained first using grid search to optimize the  
241 hyperparameters for the model yielding the best evaluation statistics through cross validation.  
242 The hyperparameters obtained from the grid search were then used to train the classifier with  
243 a training to test sample split to 75:25. The scoring function used for optimizing the  
244 hyperparameters was chosen as F1 score owing to imbalanced nature of the dataset used for  
245 training. Scikit-learn(Pedregosa *et al.* 2011) was used to import the random forest classifier  
246 base algorithm. Training was performed on the same data sets both with and without  
247 environment features. All the data sets were compiled using R and

248 Rstudio( <http://www.rstudio.com/>) and machine learning was performed using python3.7 via  
249 anaconda-navigator (<https://anaconda.com>).

## 250 **2.8 Network Analysis**

251 To reduce the number of false positives obtained from the random forest classifier, a holistic  
252 approach was adopted as described in figure 3 to include the intra protein predictions. To  
253 determine the intra contacts, we used the co-evolution method as described in 2.3.1 by  
254 concatenating Protein A with itself (similarly for Protein B) (figure 3B). To determine the  
255 contact forming intra-protein residue pairs, the residues present at a sequential distance less  
256 than 5 residues were eliminated and only top 5% of the coevolution values were taken as  
257 positive. The residue pairs obtained from this analysis for both proteins were used to plot the  
258 intra-protein residue networks in Rstudio using igraph package(Csárdi and Nepusz 2006).

259 The predictions from the random forest classifier were used to plot inter-protein residue  
260 network as a bipartite graph using the igraph package in Rstudio. Since the RSA for residues  
261 present in the core of the protein should be 0, these residues were extracted from  
262 SPIDER3(Heffernan *et al.* 2017) for both the proteins independently. A residual network was  
263 hence computed for the inter-protein contact predications by first eliminating the nodes  
264 representing RSA=0 and then the intra-protein contacts from Protein A and B (figure 3C and  
265 3D. This residual network was then analysed for the false positives and true positives on a  
266 protein complex with known 3D structure of the protein of interest.

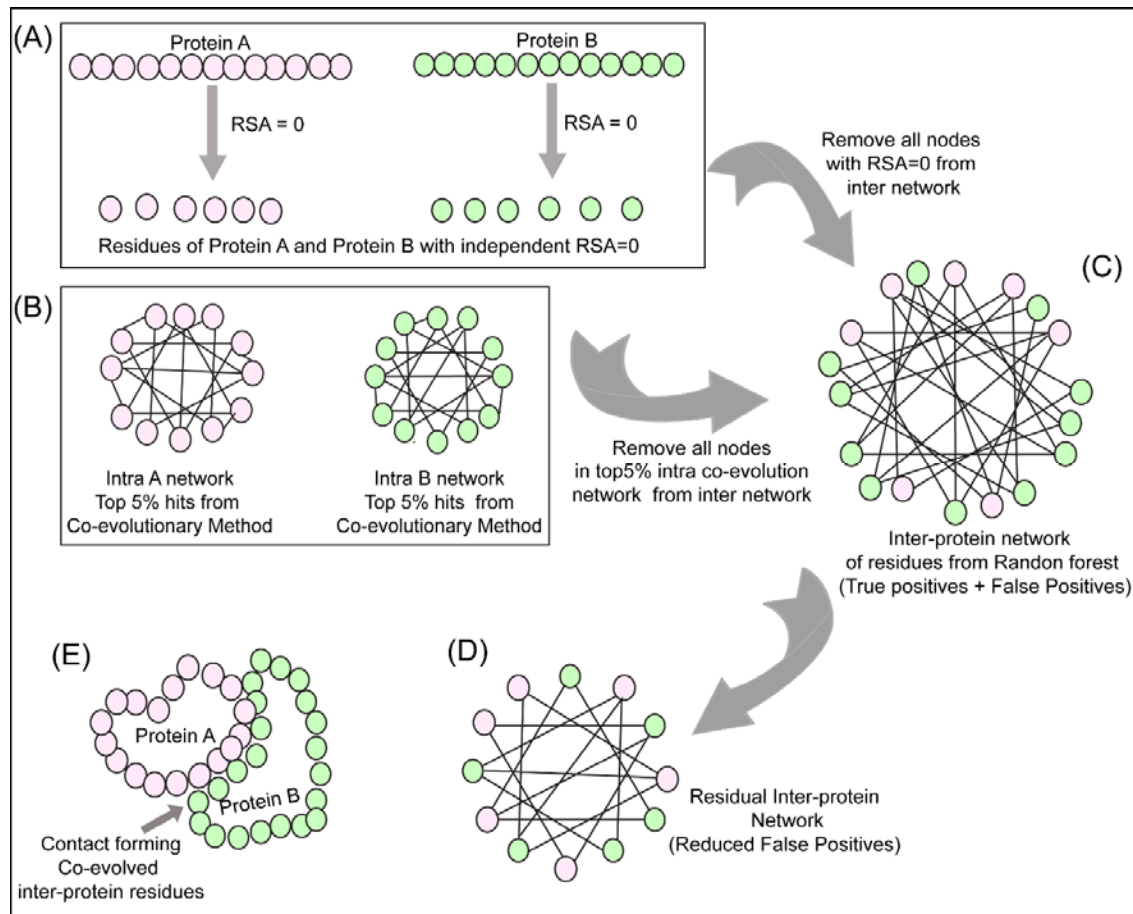

267

268 **Figure 3: Network analysis of intra and inter protein contacts.** (A) Extraction of residues  
269 with RSA=0 for Protein A and B. (B) Intra contact prediction for Protein A and B (top 5%  
270 co-evolving residue pairs). (C) Predicted inter protein network from random forest classifier.  
271 (D) The false positive inter protein residue pairs obtained from the random forest classifier  
272 are reduced by removing nodes having RSA=0 for Protein A and B as well as top 5% co-  
273 evolving intra protein residues of Protein A and B. (E) Analysis of the inter-contact from  
274 residual network onto the structure of Protein A and B.

### 275 3. Result and Discussion

#### 276 3.1 Feature Derivation

277 The predictability of any supervised machine learning method is dependent on the nature of  
278 features used for training. Random forest classifier is a tree-structure based algorithm where  
279 the classification rules are learned based on the feature values and their target class provided  
280 while training. Various features generated for training the random forest classifier were  
281 divided into three categories viz conservation, structure based and contact potential-based  
282 features. For the conservation-based feature, a new co-evolution algorithm was derived as  
283 explained in 2.3.1 and figure 2. The new method as described in section 2.3.1 provided better

284 scores for the interface residues as opposed to other co-evolution methods (table S2). Another  
285 important difference was generation of only a single non-symmetric MXN matrix from this  
286 method as opposed to LXL (where  $L = M + N$ ) from other methods which result in higher  
287 signal to noise ratios. Thus, the conditional mutual information (CMI) based method was able  
288 to provide more confidence to the co-evolving pair of residues and decreasing the noise by  
289 generating the MXN matrices. Moreover, the co-evolving pair of residues in the interacting  
290 proteins maintain the homeostasis of the interaction across species hence using them as a  
291 feature as opposed to the standard PSSM based conservation methods (such as  
292 PAIRpred (Afsar Minhas, Geiss and Ben-Hur 2014), eFindSite (Maheshwari and Brylinski  
293 2016), Cons-PPISP (Chen and Zhou 2005), PSIVER (Murakami and Mizuguchi 2010) etc)  
294 provided better predictability.

295 The nature of physicochemical properties of the residue interaction in the protein interface  
296 are somewhere in between their properties when present in the core or on the surface of the  
297 protein. It has been reported that the interface environment is closer to that exhibited on the  
298 outside in contact with the solvent as opposed to that present in the core of the protein (Jones  
299 and Thornton 1995). For example, relative solvent accessibility of a residue which defines its  
300 possible position in the protein i.e. whether it will be present in the core of the protein  
301 (relative solvent accessibility of 0) or is solvent exposed (relative solvent accessibility  $> 0$ ).  
302 For the residues which lie in the PPI interface should have value as  $0 < RSA < 1$ , if the value is  
303 scaled between 0 and 1. Due to lack of specific standard matrices for inter-protein residue  
304 contacts, those derived for intra-protein contacts were used for feature generation in this  
305 method which includes charge, hydrophobe and size compatibilities, relative solvent  
306 accessibility and secondary structure predictions.

307 The knowledge based statistical potentials have also been used previously to mimic the  
308 interactions between the amino acids in a protein. One of such knowledge-based potential is  
309 the contact potential derived by Miyazawa and Jernigan based on statistical analysis of the  
310 protein structures. These contact potentials are widely used in the computational prediction  
311 for protein folding. The contact potentials for the residue lying in the PPI interface should  
312 ideally lie in between those of buried and exposed residues. To access their applicability in  
313 identifying interface residues of the interacting proteins three approximations of these contact  
314 potentials were used as features.

315 The contacts between two residues of the interacting proteins also depends on its  
316 neighbouring residues by creating a favourable niche for the interaction to take place. Hence  
317 the properties governing the interaction (as described above) of the neighbouring residues  
318 will also have an impact on the overall predictability of the random forest classifier. To  
319 address this, the random forest classifier was trained in two different modes i.e. with and  
320 without environment features, the results of which are explained below.

### 321 **3.2 Evaluation of environment features in random forest classifier**

322 To validate the effect of the environment features on the random forest classifier, the  
323 classifier was trained both with and without the environment features. The evaluation metrics  
324 obtained for both the cases are listed in supplementary table S3. The overall accuracy  
325 obtained for the dataset trained with the environment features was 85.3% as opposed to that  
326 for without environment features was 80%. The Receiver-Operator Curve and confusion  
327 matrix for five-fold cross validation for dataset with environment features is shown in figure  
328 4 and that without environment is depicted in supplementary figure S2. As observed through  
329 all the evaluation statistics, the classifier predicts with better precision and recall and hence  
330 F1 measure, especially for the class label 1, when the environment features are used for  
331 training. Thus, validating that these derived features (environment features) are important in  
332 predicting the contact forming residue pairs for the interacting proteins.

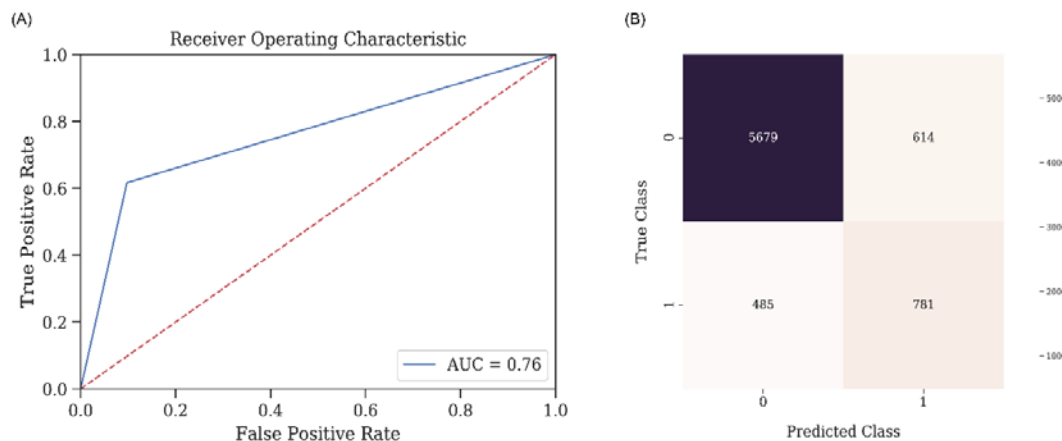

333  
334 **Figure 4: Statistics for the Random Forest Classifier Model for predicting contact**  
335 **forming residue pairs.** (A) Receiver-operator curve (ROC) depicting Area under the curve  
336 (AUC) as 0.76 when the model is tested on the 75:25 data split. (B) Confusion matrix for the  
337 tested model on 75:25 data split with a final accuracy of 85.33%

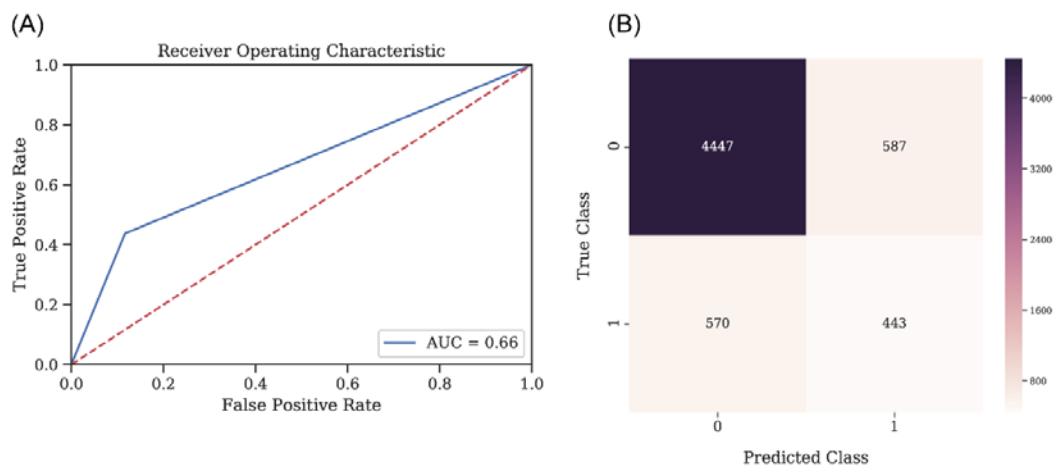

338  
 339 **Figure S2: Statistics for the Random Forest Classifier Model for predicting contact**  
 340 **forming residue pairs without environmental features.** (A) Receiver-operator curve  
 341 (ROC) depicting Area under the curve (AUC) as 0.66 when the model is tested on the 75:25  
 342 data split. (B) Confusion matrix for the tested model on 75:25 data split with a final accuracy  
 343 of 80%

344 **Table S3: Comparison of evaluation statistics, with and without environmental features.**

|                                               | Class                   | Precision   | Recall      | F1-score    |
|-----------------------------------------------|-------------------------|-------------|-------------|-------------|
| <b>Without<br/>Environmental<br/>Features</b> | <b>0</b>                | <b>0.89</b> | <b>0.88</b> | <b>0.88</b> |
|                                               | <b>1</b>                | <b>0.43</b> | <b>0.44</b> | <b>0.43</b> |
|                                               | <b>Weighted<br/>Avg</b> | <b>0.81</b> | <b>0.81</b> | <b>0.81</b> |
| <b>With<br/>Environmental<br/>Features</b>    | <b>0</b>                | <b>0.92</b> | <b>0.91</b> | <b>0.91</b> |
|                                               | <b>1</b>                | <b>0.56</b> | <b>0.59</b> | <b>0.58</b> |
|                                               | <b>Weighted<br/>Avg</b> | <b>0.86</b> | <b>0.85</b> | <b>0.86</b> |

345

### 346 *3.3 Feature importance evaluation*

347 One of the marked features of random forest classifier is that it is able to decipher the  
 348 importance of every feature used for training which can be used to determine the over-fitting  
 349 of a model as well as to gain insights about the physical relevance of the features in  
 350 predicting the PPI interface. The feature importance plot for the dataset without the  
 351 environment features (supplementary figure S3) depicts that the three most important features  
 352 are relative solvent accessibility (RSA), co-evolution scores (CMI) and the contact potentials  
 353 (CP). However, the feature importance plot for the dataset with environment features (18  
 354 features in all) (figure 5), depicts the importance of these derived features. Of the 18 features,  
 355 used for training, top 12 positions have all 9 derived features along with RSA, CMI and CP.



356 Thus, it is evident that all these features play a crucial role for the prediction of protein  
357 interaction interfaces.

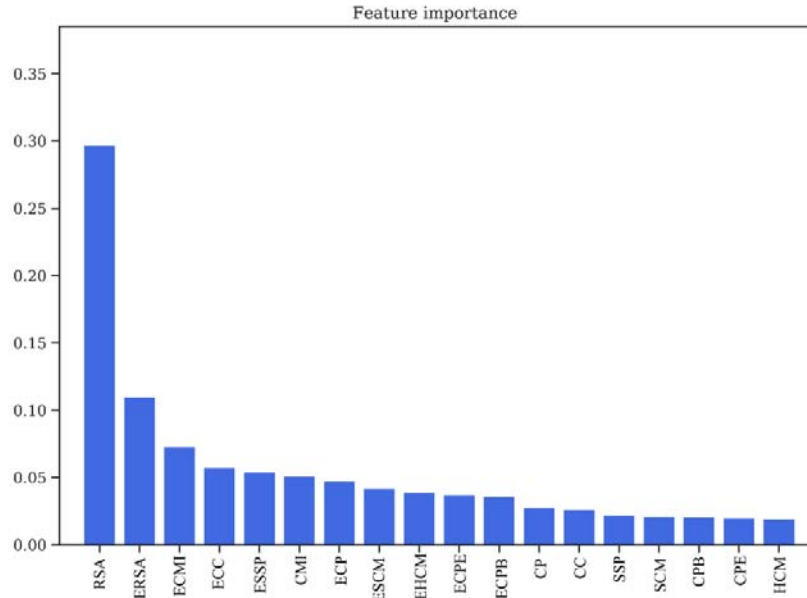

358

359 **Figure 5: Feature Importance obtained from Random Forest Classifier.**

360 Relative Solvent Accessibility (RSA/ERSA) and Co-evolution Scores (ECMI/CMI) as two of  
361 the most important features in training the model. **RSA:** Relative Solvent Accessibility.  
362 **ERSA:** Environment Relative Solvent Accessibility. **ECMI:** Environment Conditional  
363 Mutual Information. **ECC:** Environment Charge Compatibility. **ESSP:** Environment  
364 Secondary Structure Prediction. **CMI:** Conditional Mutual Information. **ECP:** Environment  
365 Contact Potential. **ESCM:** Environment Structure Compatibility Matrix. **EHCM:**  
366 Environment Hydrophathy Compatibility Matrix. **ECPE:** Environment Contact Potential for  
367 Exposed residues. **ECPB:** Environment Contact Potential for Buried residues. **CP:** Contact  
368 Potential. **CC:** Charge Compatibility. **SSP:** Secondary Structure Prediction. **SCM:** Structure  
369 Compatibility Matrix. **CPB:** Contact Potential for Buried residues. **CPE:** Contact Potential  
370 for Exposed residues. **HCM:** Hydrophathy Compatibility Matrix.

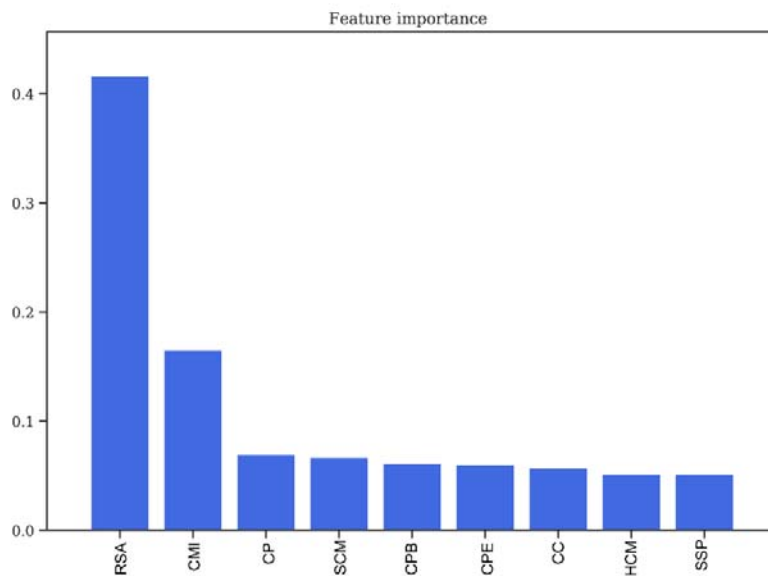

371

372 **Figure S3: Feature Importance obtained from Random Forest Classifier without**  
373 **environmental features.**

374 Relative Solvent Accessibility (RSA) and Co-evolution Scores (CMI) as two of the most  
375 important features in training the model. **RSA:** Relative Solvent Accessibility. **CMI:**  
376 Conditional Mutual Information. **CP:** Contact Potential. **SCM:** Structure Compatibility  
377 Matrix. **CPB:** Contact Potential for Buried residues. **CPE:** Contact Potential for Exposed  
378 residues. **CC:** Charge Compatibility. **HCM:** Hydropathy Compatibility Matrix. **SSP:**  
379 Secondary Structure Prediction.

#### 380 **4. Validation of prediction onto test dataset**

381 The pipeline CoRNeA was used to test its predictability on a protein complexes with a known  
382 crystal structure. One of them was the crystal structure of Vav and Grb2 Sh2 domain (PDB  
383 ID: 1GCQ)(Nishida *et al.* 2001) which consists of three chains. One of Vav proto-oncogene  
384 (Chain C) and the other two of growth factor receptor-bound protein 2 (Chain A and Chain  
385 B). The dataset was compiled for this protein pair using Chain A and Chain C of 1GCQ as  
386 query. The features were calculated as described above and used as test dataset for evaluating  
387 the trained random forest model. The total size of the dataset created by these two chains  
388 amounted to 4002 pairs of residues. The random forest classifier predicted 25 pairs correctly  
389 as true positives and 967 pairs were predicted as false positives.

390 To further reduce the number of false positive pairs, network analysis was performed. The  
391 intra protein contact forming residue pairs for Chain A (Protein A) and Chain C (Protein B)  
392 of 1GCQ were obtained from co-evolution analysis where only top 5% pairwise values were

393 considered to be true cases. The length of Chain A is 56 amino acids which would lead to  
394 3,136 intra pairs. The highest scoring 157 pairs were considered while constructing the intra  
395 protein contact forming residue network of Chain A of 1GCQ as depicted in supplementary  
396 figure S4 (A). The length of Chain C is 69 amino acids which would lead to 4,761 intra  
397 protein pairs. The highest scoring 238 pairs were considered while constructing the intra  
398 protein contact forming network of Chain C of 1GCQ as depicted in figure S4(B). The inter  
399 protein contact forming residue pair network of Chain A and Chain C as obtained from  
400 random forest classifier is shown in figure S4(C) which consisted to 992 predicted pairs of  
401 which 967 were false positives. A residual network was calculated from the three networks  
402 mentioned above (as shown in Figure S4(D)) to reduce the total pairs to 371 of which 52  
403 were true positives and 319 were false positives.

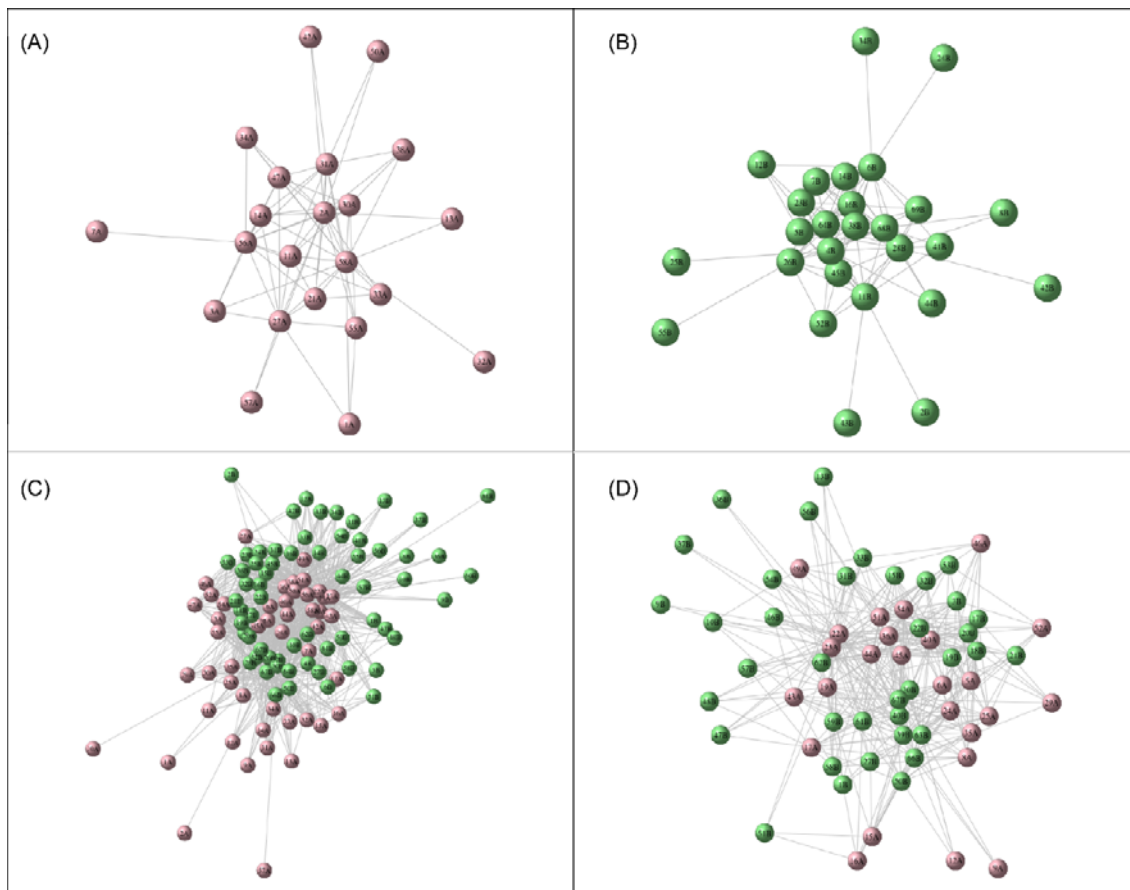

404

405 **Figure S4: Network analysis for PDB ID 1GCQ.** (A) Intra-protein network for Chain A/B  
406 of 1GCQ obtained from top 5% co-evolving intra residue pairs. (B) Intra-protein network for  
407 Chain C of 1GCQ obtained from top 5% co-evolving intra residue pairs. (C) Inter-protein  
408 network for 1GCQ obtained from random forest classifier. (D) Inter-protein network for  
409 1GCQ after removing intra-protein network nodes and all nodes having relative solvent  
410 accessibility as 0.

411 The results obtained from the network are shown onto the structure of VAV and GRB2 SH3  
 412 domains (PDB ID 1GCQ) (Figure 6A). Interestingly, the data labels provided while testing  
 413 were only for Chain A and Chain C but the labels obtained after prediction were for both the  
 414 pairs i.e. Chain A and Chain C (Figure 6B) as well as Chain B and Chain C (Figure 6C)  
 415 (details in supplementary table S4) within 10Å distance. Thus, the overall pipeline to predict  
 416 the PPI interface is fair in predicting the probable pairs of interacting residues as well as  
 417 separate out the residue which might reside on the surface of the protein from those present in  
 418 the core of the individual proteins only from amino acid sequence information. The confusion  
 419 matrix before and after the network analysis is provided in supplementary table S5.

420

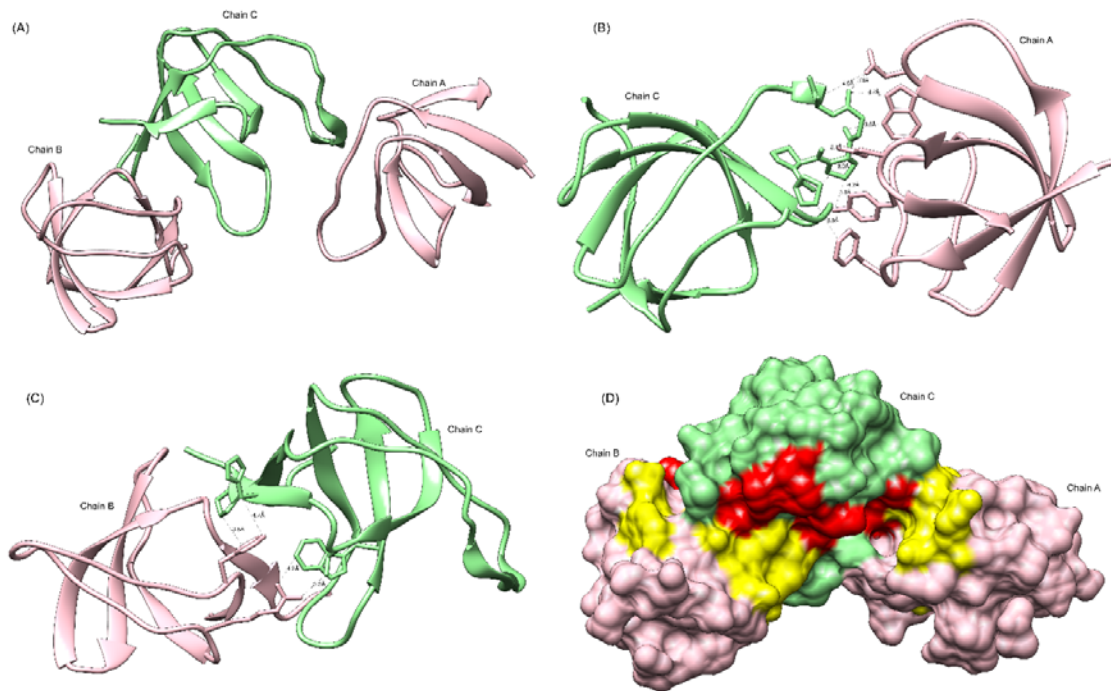

421  
 422 **Figure 6: PDB ID 1GCQ evaluated by CoRNeA.**

423 (A) Cartoon representation of 1GCQ. (B) Interface residues predicted by this method  
 424 between Chain A (pink) and Chain C (green) within 5Å distance. (C) Interface residues  
 425 predicted by this method between Chain B (pink) and Chain C (green) within 5Å distance.  
 426 (D) Surface representation of 1GCQ depicting interface residues. Chain A and B in pink and  
 427 their respective interface residues are shown in yellow. Chain C in green and its interface  
 428 residues are depicted in red.

429 **Table S4: Pairwise true contacts predicted for PDB ID 1GCQ Chain A with Chain C**  
 430 **and Chain B with Chain C within a distance cutoff of 10 Å.**

| Residue number | Residue number | Distance (Å) | Residue number | Residue number | Distance (Å) |
|----------------|----------------|--------------|----------------|----------------|--------------|
|----------------|----------------|--------------|----------------|----------------|--------------|

| (Chain A) | (Chain C) |     | (Chain B) | (Chain C) |      |
|-----------|-----------|-----|-----------|-----------|------|
| 208       | 609       | 3   | 179       | 652       | 3.3  |
| 208       | 608       | 3.3 | 165       | 657       | 3.6  |
| 209       | 610       | 3.5 | 179       | 637       | 4    |
| 192       | 611       | 3.6 | 165       | 656       | 5.3  |
| 208       | 611       | 3.6 | 211       | 629       | 5.9  |
| 193       | 610       | 4   | 179       | 653       | 6.6  |
| 193       | 611       | 4   | 165       | 653       | 7.25 |
| 208       | 612       | 4.3 | 179       | 651       | 7.7  |
| 192       | 612       | 4.4 | 179       | 636       | 8    |
| 165       | 608       | 4.8 | 179       | 656       | 8    |
| 209       | 611       | 4.9 | 179       | 657       | 8    |
| 208       | 610       | 5.2 | 209       | 612       | 8.3  |
| 193       | 612       | 5.6 | 163       | 657       | 8.3  |
| 206       | 612       | 6   | 179       | 630       | 8.7  |
| 193       | 609       | 7.3 | 182       | 630       | 8.8  |
| 208       | 607       | 7.7 | 179       | 627       | 9    |
| 192       | 609       | 7.7 | 180       | 637       | 9    |
| 166       | 653       | 7.8 | 208       | 593       | 9.3  |
| 179       | 607       | 8.5 | 211       | 593       | 9.3  |
| 165       | 609       | 8.7 | 179       | 629       | 9.5  |
| 193       | 608       | 8.8 | 179       | 600       | 10   |
| 165       | 610       | 8.9 | 180       | 630       | 10   |
| 209       | 653       | 9.3 | 211       | 652       | 10   |
| 192       | 608       | 9.6 | 192       | 657       | 10   |
| 165       | 651       | 9.6 | 211       | 657       | 10   |
| 179       | 608       | 9.8 |           |           |      |
| 174       | 612       | 10  |           |           |      |

431

432 **Table S5: Confusion Matrix statistics for PDB ID 1GCQ before and after network**  
 433 **analysis**

|                                        |                   |          |                             |                              |
|----------------------------------------|-------------------|----------|-----------------------------|------------------------------|
| <b>Before<br/>Network<br/>Analysis</b> | <b>True Class</b> | <b>0</b> | <b>True Negatives= 2954</b> | <b>False Positives = 967</b> |
|                                        |                   | <b>1</b> | <b>False Negatives= 56</b>  | <b>True Positives= 25</b>    |
|                                        |                   |          | <b>0</b>                    | <b>Predicted Class</b>       |

|                                       |                     |                             |                              |
|---------------------------------------|---------------------|-----------------------------|------------------------------|
| <b>After<br/>Network<br/>Analysis</b> | <b>0</b>            | <b>True Negatives= 3575</b> | <b>False Positives = 319</b> |
|                                       | <b>True Class 1</b> | <b>False Negatives= 56</b>  | <b>True Positives= 52</b>    |
|                                       |                     | <b>0</b>                    | <b>Predicted Class 1</b>     |

434

435 To test the applicability of the pipeline on larger protein complexes, the structure of the alpha  
436 gamma heterodimer of human IDH3 (PDB ID: 5YVT)(Liu *et al.* 2018) (Figure S5A) was  
437 used as a test dataset. This protein complex is from mitochondrial origin and its length  
438 (M+N) is larger (693 amino acids) as compared to the previous example (PDB ID: 1GCQ,  
439 127 amino acids). The random forest classifier was able to predict 64 out of 164 contacts  
440 with precision. Network analysis was performed for this dataset by calculating the intra  
441 contacts of both chains A and B. The residual network resulted in 992 edges of which 24  
442 pairs formed the actual contacts when mapped onto the structure. In terms of the interface  
443 residues covered amongst these 24 pairs, 50% of the pairs were correctly identified by  
444 CoRN<sub>e</sub>A as shown in figure 6A and 6B. Hence this new pipeline can be used for proteins  
445 from eukaryotic origin as well as the length of the pair of proteins in consideration is not a  
446 limiting factor.



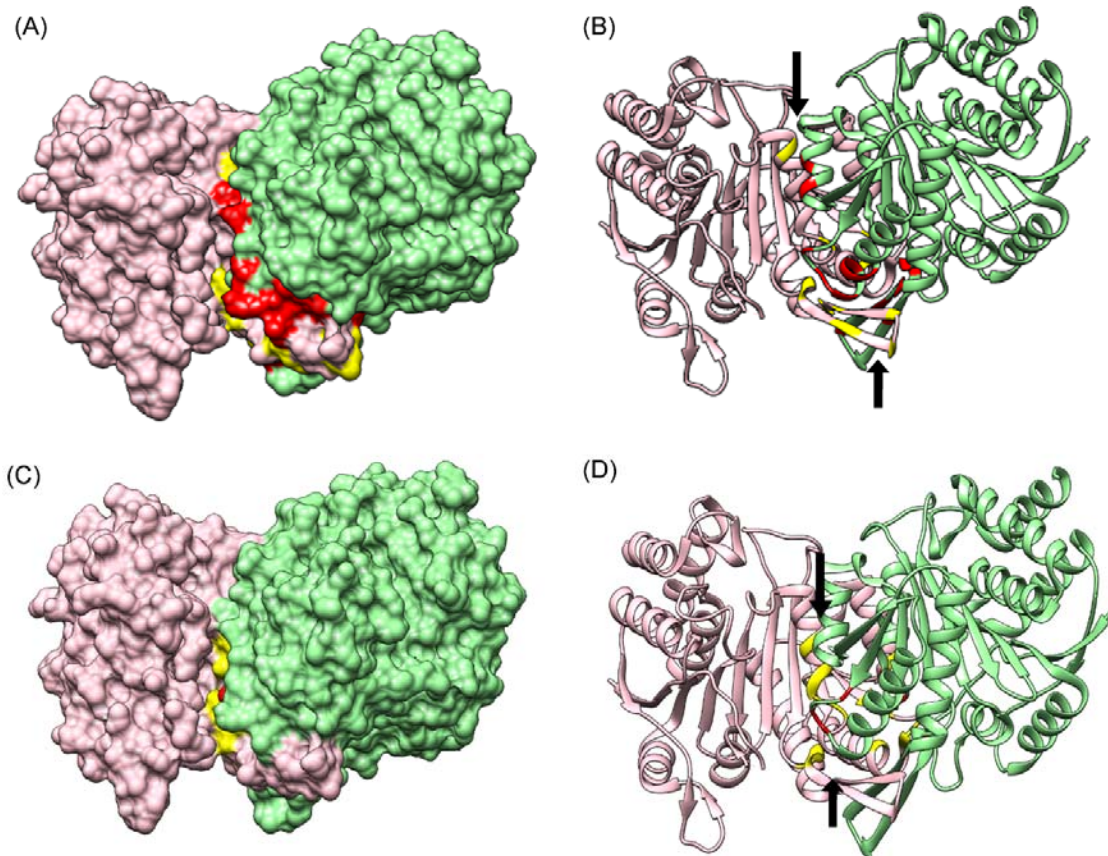

447

#### 448 **Figure 6: PDB ID 5YVT evaluated using CoRNeA and BIPSPI**

449 A. Surface representation of 5YVT depicting interface residues predicted by CoRNeA. B.  
450 Cartoon representation of interface residues predicted by CoRNeA. C. Surface representation  
451 of 5YVT depicting interface residues predicted by BIPSPI. D. Cartoon representation of  
452 interface residues predicted by BIPSPI Chain A in pink and their respective interface residues  
453 are shown in yellow. Chain B in green and its interface residues are depicted in red. The  
454 black arrows indicate the regions of interface predicted by CoRNeA/BIPSPI.

#### 455 **Comparison with other methods**

456 To access the predictability of CoRNeA, the results obtained from it for the two test cases  
457 described above, were compared to the predictions of recently published method  
458 BIPSPI(Ruben Sanchez-Garcia *et al.* 2019) which is closest to our implementation. The  
459 sequence mode of prediction on BIPSPI server was employed for predicting the interface  
460 residues of 1GCQ and 5YVT. In case of 1GCQ, none of the predicted pairs had a prediction  
461 score more than 0.5 which is the threshold for any machine learning based method. Of the top  
462 20 pairwise predictions obtained, only two pairs were found to be in the interface zone when  
463 mapped onto the structure. For 5YVT, 1234 pairs were reported by BIPSPI, above the  
464 threshold prediction value of 0.5, of which 24 were true interface forming pairs. The results



465 obtained were mapped onto the structure of 5YVT as shown in figure 6C and 6D. It was  
466 observed that the regions which spanned most of these predictions were smaller as compared  
467 to that predicted by CoRNeA (figure 6B). Moreover, the final predictions from CoRNeA  
468 yielded in fewer false positives than BIPSPI hence validating the overall improvement in the  
469 accuracy of the prediction of PPI interface residues (Table S6).

470 **Table S6: Comparison of predictions from CoRNeA with BIPSPI**

|                     | <b>Method</b> | <b>Expected no<br/>of residues<br/>within 10Å</b> | <b>Number of True positives<br/>with probability more<br/>than 0.5</b> | <b>Number of<br/>False<br/>Positives</b> |
|---------------------|---------------|---------------------------------------------------|------------------------------------------------------------------------|------------------------------------------|
| <b>PDB ID: 1GCQ</b> | <b>BIPSPI</b> | <b>108</b>                                        | <b>0</b>                                                               | <b>N/A</b>                               |
|                     | <b>CoRNeA</b> |                                                   | <b>52</b>                                                              | <b>56</b>                                |
| <b>PDB ID: 5YVT</b> | <b>BIPSPI</b> | <b>164</b>                                        | <b>24</b>                                                              | <b>1210</b>                              |
|                     | <b>CoRNeA</b> |                                                   | <b>24</b>                                                              | <b>968</b>                               |

471 The numbers depicted for CoRNeA are post network analysis. For 1GCQ the total number of  
472 expected contacts and true positives are for both chain combinations i.e. Chain A and C;  
473 Chain B and C

474 CoRNeA can however, be further optimized to reduce the false positive rates as well as  
475 improve the true positive predictions by increasing the training dataset. It is evident that the  
476 environmental features play a very important role in training the classifier and thus tweaking  
477 around the size and weights of the kernel matrix can be performed to generate the derived  
478 features and yield in better and specific results.

## 479 **Conclusions**

480 Predicting the pairwise interacting residues for any two-given pair of proteins from only the  
481 amino acid sequence still remains a challenging problem. In this study, the newly designed  
482 pipeline CoRNeA addresses some of the challenges for predicting the PPI interfaces such as  
483 applicability to eukaryotic PPI and high false positive rated by incorporating co-evolution  
484 information and intra contacts for improving the precision and recall of the pipeline. This  
485 pipeline can be utilized to predict the interface residues as a pairwise entity and also to  
486 understand folding of the individual proteins though intra contact predictions. Obtaining the  
487 structural information of proteins individually as well as in complex with their interacting  
488 partners is a tremendously challenging problem specially for large multimeric complexes.  
489 CoRNeA can be utilized to identify the minimal interacting regions in the heterodimers

490 which can then be utilized in structure elucidation studies. The information obtained from  
491 CoRNeA can also be used as a starting point for protein docking studies in case 3D structure  
492 models (experimental or homology based) are available.

### 493 **Author Contributions**

494

495

496

497

### 498 **References**

499 Afsar Minhas F ul A, Geiss BJ, Ben-Hur A. PAIRpred: Partner-specific prediction of  
500 interacting residues from sequence and structure. *Proteins Struct Funct Bioinforma*  
501 2014;**82**:1142–55.

502 Biro JC. Amino acid size, charge, hydropathy indices and matrices for protein structure  
503 analysis. *Theor Biol Med Model* 2006;**3**:1–12.

504 Chen H, Zhou HX. Prediction of interface residues in protein-protein complexes by a  
505 consensus neural network method: Test against NMR data. *Proteins Struct Funct Genet*  
506 2005;**61**:21–35.

507 Csárdi G, Nepusz T. The igraph software package for complex network research.  
508 *InterJournal , Complex Syst* 2006;**1695**, DOI: 10.3724/SP.J.1087.2009.02191.

509 Finn RD, Clements J, Arndt W *et al.* HMMER web server: 2015 Update. *Nucleic Acids Res*  
510 2015;**43**:W30–8.

511 Godwin B, Uetz P, Johnston M *et al.* A comprehensive analysis of protein-protein  
512 interactions in *Saccharomyces cerevisiae*. *Nature* 2000;**403**:623–7.

513 Goncarenco A, Shaytan AK, Shoemaker BA *et al.* Structural Perspectives on the  
514 Evolutionary Expansion of Unique Protein-Protein Binding Sites. *Biophys J*  
515 2015;**109**:1295–306.

516 Gouy M, Milleret F, Mugnier C *et al.* ACNUC: a nucleic acid sequence data base and  
517 analysis system. *Nucleic Acids Res* 1984;**12**:121–7.

- 518 Green AG, Marks DS, Bonvin AMJJ *et al.* Sequence co-evolution gives 3D contacts and  
519 structures of protein complexes. *Elife* 2014;**3**:1–45.
- 520 Heffernan R, Yang Y, Paliwal K *et al.* Capturing non-local interactions by long short-term  
521 memory bidirectional recurrent neural networks for improving prediction of protein  
522 secondary structure, backbone angles, contact numbers and solvent accessibility.  
523 *Bioinformatics* 2017;**33**:2842–9.
- 524 Honavar V, Jordan RA, EL-Manzalawy Y *et al.* Predicting protein-protein interface residues  
525 using local surface structural similarity. *BMC Bioinformatics* 2012;**13**:41.
- 526 Jones DT. Protein secondary structure prediction based on position-specific scoring matrices.  
527 *J Mol Biol* 1999;**292**:195–202.
- 528 Jones S, Thornton JM. PROTEIN-PROTEIN INTERACTIONS: A REVIEW OF PROTEIN  
529 DIMER STRUCTURES. *Prog Biophys molec Biol* 1995;**63**:31–65.
- 530 Kastritis PL, Moal IH, Hwang H *et al.* A structure-based benchmark for protein-protein  
531 binding affinity. *Protein Sci* 2011;**20**:482–91.
- 532 Krissinel E, Henrick K. Inference of Macromolecular Assemblies from Crystalline State. *J*  
533 *Mol Biol* 2007;**372**:774–97.
- 534 Kufareva I, Budagyan L, Raush E *et al.* PIER: Protein Interface Recognition for Structural  
535 Proteomics. *PROTEINS Struct Funct Bioinforma* 2007;**67**:400–17.
- 536 Liang S, Zhang C, Liu S *et al.* Protein binding site prediction using an empirical scoring  
537 function. *Nucleic Acids Res* 2006;**34**:3698–707.
- 538 Liu Y, Hu L, Ma T *et al.* Insights into the inhibitory mechanisms of NADH on the  $\alpha\gamma$   
539 heterodimer of human NAD-dependent isocitrate dehydrogenase. *Sci Rep* 2018;**8**:1–12.
- 540 Lockless SW. Evolutionarily Conserved Pathways of Energetic Connectivity in Protein  
541 Families. *Science (80- )* 2002;**286**:295–9.
- 542 Maheshwari S, Brylinski M. Template-based identification of protein-protein interfaces using  
543 eFindSitePPI. *Methods* 2016;**93**:64–71.
- 544 Masters SC. Co-Immunoprecipitation from Transfected Cells BT - Protein-Protein  
545 Interactions: Methods and Applications. In: Fu H (ed.). Totowa, NJ: Humana Press,  
546 2004, 337–48.

- 547 Miyazawa S, Jernigan RL. Residue-Residue Potentials with a Favorable Contact Pair Term  
548 and an Unfavorable High Packing Density Term, for Simulation and Threading - 1-s2.0-  
549 S002228369690114X-main.pdf. *J Mol Biol* 1996;623–44.
- 550 Murakami Y, Mizuguchi K. Applying the Naïve Bayes classifier with kernel density  
551 estimation to the prediction of protein-protein interaction sites. *Bioinformatics*  
552 2010;**26**:1841–8.
- 553 Negi, S.S.; Catherine, H.S.; Oezguen, N.; Power TD. BW. InterProSurf: a web server for  
554 predicting interacting sites on protein Surfaces. *Bioinformatics* 2007;**23**:3397–9.
- 555 Neuvirth H, Raz R, Schreiber G. ProMate: A structure based prediction program to identify  
556 the location of protein-protein binding sites. *J Mol Biol* 2004;**338**:181–99.
- 557 Nishida M, Nagata K, Hachimori Y *et al.* Novel recognition mode between Vav and Grb2  
558 SH3 domains. *EMBO J* 2001;**20**:2995–3007.
- 559 Pedregosa F, Varoquaux G, Gramfort A *et al.* Scikit-learn: Machine Learning in Python. *J*  
560 *Mach Learn Res* 2011;**12**:2825–30.
- 561 Pei J, Kim BH, Grishin N V. PROMALS3D: A tool for multiple protein sequence and  
562 structure alignments. *Nucleic Acids Res* 2008;**36**:2295–300.
- 563 Porollo A, Meller J. Prediction-Based Fingerprints of Protein–Protein Interactions.  
564 *PROTEINS Struct Funct Bioinforma* 2007;**66**:630–45.
- 565 Qin S, Zhou HX. Meta-PPISP: A meta web server for protein-protein interaction site  
566 prediction. *Bioinformatics* 2007;**23**:3386–7.
- 567 Rodriguez-Rivas J, Marsili S, Juan D *et al.* Conservation of coevolving protein interfaces  
568 bridges prokaryote–eukaryote homologies in the twilight zone. *Proc Natl Acad Sci*  
569 2016;**113**:15018–23.
- 570 Ruben Sanchez-Garcia, Sorzano COS, Carazo JM and *et al.* BIPSPI: a method for the  
571 prediction of Partner- Specific Protein-Protein Interfaces. *Bioinformatics* 2019;**35**:470–  
572 7.
- 573 Segura J, Jones PF, Fernandez-Fuentes N. Improving the prediction of protein binding sites  
574 by combining heterogeneous data and Voronoi diagrams. *BMC Bioinformatics* 2011;**12**,  
575 DOI: 10.1186/1471-2105-12-352.

- 576 Sobott F, Robinson C V. Protein complexes gain momentum. *Curr Opin Struct Biol*  
577 2002;**12**:729–34.
- 578 de Vries SJ, Bonvin AMJJ. Cport: A consensus interface predictor and its performance in  
579 prediction-driven docking with HADDOCK. *PLoS One* 2011;**6**, DOI:  
580 10.1371/journal.pone.0017695.
- 581 Vries SJ de, Dijk ADJ van, Bonvin AMJJ. WHISCY: What Information Does Surface  
582 Conservation Yield? Application to Data-Driven Docking. *PROTEINS Struct Funct*  
583 *Bioinforma* 2006;**63**:479–89.
- 584 Waterhouse AM, Procter JB, Martin DMA *et al.* Jalview Version 2-A multiple sequence  
585 alignment editor and analysis workbench. *Bioinformatics* 2009;**25**:1189–91.
- 586 Weigt M, White RA, Szurmant H *et al.* Identification of direct residue contacts in protein–  
587 protein interaction by message passing. *Proc Natl Acad Sci U S A* 2009;**106**:67–72.
- 588 Wyner AD. A definition of conditional mutual information for arbitrary ensembles. *Inf*  
589 *Control* 1978;**38**:51–9.
- 590 Xue LC, Dobbs D, Honavar V. HomPPI: A class of sequence homology based protein–  
591 protein interface prediction methods. *BMC Bioinformatics* 2011;**12**, DOI: 10.1186/1471-  
592 2105-12-244.
- 593 Zeng H, Liu K-S, Zheng W-M. The Miyazawa-Jernigan Contact Energies Revisited. *Open*  
594 *Bioinforma J* 2012;**6**:1–8.
- 595 Zeng H, Wang S, Zhou T *et al.* ComplexContact: A web server for inter-protein contact  
596 prediction using deep learning. *Nucleic Acids Res* 2018;**46**:W432–7.
- 597 Zhang QC, Deng L, Fisher M *et al.* PredUs: A web server for predicting protein interfaces  
598 using structural neighbors. *Nucleic Acids Res* 2011;**39**:283–7.
- 599 **Table S1: Numeric Coding for amino acids used for co-evolution score calculations**

| Amino Acid     | Numeric Coding |
|----------------|----------------|
| V (Valine)     | 1              |
| I (Isoleucine) | 2              |
| L (Leucine)    | 3              |
| M (Methionine) | 4              |

|                             |    |
|-----------------------------|----|
| F (Phenylalanine)           | 5  |
| W (Tryptophan)              | 6  |
| Y (Tyrosine)                | 7  |
| S (Serine)                  | 8  |
| T (Threonine)               | 9  |
| N (Asparagine)              | 10 |
| Q (Glutamine)               | 11 |
| H (Histidine)               | 12 |
| K (Lysine)                  | 13 |
| R (Arginine)                | 14 |
| D (Aspartic Acid)           | 15 |
| E (Glutamic acid)           | 16 |
| A (Alanine)                 | 17 |
| G (Glycine)                 | 18 |
| P (Proline)                 | 19 |
| C (Cysteine)                | 20 |
| - (Gap)                     | 21 |
| X (Non-Standard Amino Acid) | 22 |

600

601 **Table S2: Comparison of known methods for PPI interface prediction with the new**  
 602 **hybrid method**

| Interface residues (PISA) |              |             | Various algorithms for finding contacts |                |                |               |                  |
|---------------------------|--------------|-------------|-----------------------------------------|----------------|----------------|---------------|------------------|
| Nup107                    | Nup133       | Distance(Å) | MI                                      | DCA            | Evfold         | SCA           | New Method (CMI) |
|                           |              |             | <b>(2.03)</b>                           | <b>(0.158)</b> | <b>(0.155)</b> | <b>(3.86)</b> | <b>(1.00)</b>    |
| <b>D 879</b>              | <b>T 696</b> | 3.37        | 0.4285                                  | 0.0022         | 0.0052         | 0.618         | <b>0.804</b>     |
| <b>S 822</b>              | <b>K 975</b> | 2.78        | 0.2379                                  | 0.0009         | 0.0023         | 0.1607        | <b>0.591</b>     |
| <b>E 884</b>              | <b>K 975</b> | 2.69        | 0.2379                                  | 0.0001         | 0.0021         | 0.339         | <b>0.524</b>     |
| <b>D 917</b>              | <b>K 966</b> | 2.53        | 0.0104                                  | 0.0005         | 0.0013         | 0.192         | <b>0.642</b>     |
| <b>Y 921</b>              | <b>K 966</b> | 3.37        | 0.225                                   | 0.0008         | 0.003          | 0.616         | <b>0.364</b>     |

|              |              |      |        |        |        |       |              |
|--------------|--------------|------|--------|--------|--------|-------|--------------|
| <b>E 922</b> | <b>R 962</b> | 3.18 | 0.7898 | 0.0015 | 0.002  | 0.742 | <b>0.342</b> |
| <b>K 894</b> | <b>D 982</b> | 3.82 | 0.354  | 0.005  | 0.0005 | 0.223 | <b>0.371</b> |
| <b>R 898</b> | <b>A 980</b> | 3.28 | 0.179  | 0.001  | 0.0025 | 0.039 | <b>0.233</b> |
| <b>Q 902</b> | <b>Q 944</b> | 3.35 | 0.8474 | 0.002  | 0.001  | 1.46  | <b>0.159</b> |

603 The interface residues for a test case as predicted by PISA. The value under the name of the method  
604 represents the highest score calculated by the algorithm. MI: Mutual information, DCA: Direct  
605 Coupling Analysis, SCA: Statistical Coupling Analysis.
