1 **CoRNeA: A pipeline to decrypt the inter protein interfaces from amino acid sequence**  
2 **information**

3 Kriti Chopra<sup>1</sup>, Bhawna Burdak<sup>1</sup>, Kaushal Sharma<sup>2</sup>, Ajit Kembavi<sup>2</sup>, Shekhar C. Mande<sup>3</sup>, and  
4 Radha Chauhan<sup>1\*</sup>

5 1- National Centre for Cell Science, Pune, Maharashtra, India.

6 2- Inter University Centre for Astronomy and Astrophysics, Pune, Maharashtra, India

7 3- Council of Scientific and Industrial Research (CSIR), New Delhi, India

8 **\*Corresponding Author:**

9 Dr. Radha Chauhan, Scientist 'E', National Centre for Cell Science, S.P. Pune University

10 Campus, Ganeshkhind, Pune 411007, Maharashtra, India.

11 Email: [radha.chauhan@nccs.res.in](mailto:radha.chauhan@nccs.res.in)

12 Phone: +91-20-25708255

13

14

15

16

17

18

19

20

21

22

23

24

25

26

27 **Abstract**

28 Computational methods have been devised in the past to predict the interface residues using  
29 amino acid sequence information but have been majorly applied to predict for prokaryotic  
30 protein complexes. Since the composition and rate of evolution of the primary sequence are  
31 different between prokaryotes and eukaryotes, it is important to develop a method  
32 specifically for eukaryotic complexes. Here we report a new hybrid pipeline for the  
33 prediction of protein-protein interaction interfaces from the amino acid sequence information  
34 alone based on the framework of Co-evolution, machine learning (Random forest) and  
35 Network Analysis named CoRNeA trained specifically on eukaryotic protein complexes. We  
36 incorporate the intra contact information of the individual proteins to eliminate false positives  
37 from the predictions as the amino acid sequence also holds information for its own folding  
38 along with the interface propensities. Our prediction on various case studies shows that  
39 CoRNeA can successfully identify minimal interacting regions of two partner proteins with  
40 higher precision and recall.

41

42

43

44

45

46

47

48

49

50

51

52

53

## 54 Introduction

55 The biological machinery performs its cellular functions when its basic units such as DNA,  
56 RNA, and proteins interact with each other. To understand the overall functioning of the cell,  
57 it is important to delineate the pairwise interactions of these basic units such as DNA-protein,  
58 RNA-protein, and protein-protein. Of these, the inter protein interactions that a cell possesses  
59 play a very crucial role in understanding the various cellular processes and hence also their  
60 functioning or malfunctioning in the disease models. There are various experimental methods  
61 known for examining these interactions such as yeast two hybrid (Y2H)<sup>1</sup>, co-  
62 immunoprecipitation (co-IP)<sup>2</sup>, mass spectrometry<sup>3</sup>, etc. which provide information only  
63 about the domains necessary for maintaining the interaction or the proximity of the  
64 interactions. Moreover, these methods are labor, cost and time intensive. Deciphering the  
65 PPII (Protein-Protein Interaction Interfaces) at the highest resolution through x-ray  
66 crystallography or cryo-electron microscopy methods is even more challenging due to their  
67 intrinsic technical difficulties.

68 A number of *in-silico* methods have been described earlier to predict these PPII based on  
69 available data such as 1) homology 2) machine learning and 3) co-evolution based.  
70 Homology based methods are generally applied when confident homologs of both the  
71 interacting proteins are available, followed by protein-protein docking for visualizing the  
72 protein interaction interfaces such as PredUS<sup>4</sup>, PS-HomPPI<sup>5</sup>, PriSE<sup>6</sup>, etc. The machine  
73 learning (ML) methods which have been described till date are either structure-based or  
74 sequence-based. The structure-based ML methods (such as SPPIDER<sup>7</sup>, PINUP<sup>8</sup>, PAIRpred<sup>9</sup>,  
75 PIER<sup>10</sup>, ProMate<sup>11</sup>, Cons-PPISP<sup>12</sup>, Meta-PPISP<sup>13</sup>, CPort<sup>14</sup>, WHISCY<sup>15</sup>, InterProSurf<sup>16</sup>,  
76 VORFFIP<sup>17</sup>, eFindSite<sup>18</sup>, etc.) require three-dimensional information of the interacting  
77 proteins which can be either experimental or homology driven to incorporate the geometrical  
78 complementarities of amino acids as training features. Only a few sequence-based ML  
79 methods are known such as BIPSPI<sup>19</sup>, PSIVER<sup>20</sup>, and ComplexContact<sup>21</sup> which derive  
80 features based on conservation, physicochemical properties of amino acids, etc. However, the  
81 predictability of these ML methods is affected by the prevalence of high false-positive rates  
82 due to limitation of small number of protein-complex structures in the protein structure  
83 database (PDB) which restrict the training of these machine learning algorithms in terms of  
84 variability.

85 The third class, co-evolution-based methods which were originally formulated to predict  
86 contact forming residues within a single protein and therefore for the prediction of the  
87 structure of the protein. These methods have been extrapolated to also predict the inter-  
88 protein interaction interfaces based on the multiple sequence alignments (MSA) of the  
89 proteins. Concatenating the MSA of an interacting pair and using the same statistical  
90 formulae as described for intra pairs have been implemented to predict the co-evolving  
91 contact forming pairs by various methods such as DCA<sup>22</sup>, EvComplex<sup>23</sup>, etc. However, there  
92 are two main caveats known for these methods. Firstly, they use different downstream  
93 methods to filter out their results by using homology-based models and docking predictions  
94 in combination with their results. Secondly, most of these methods have been tested on  
95 prokaryotic proteins and have a limitation of predicting only for a maximum combined length  
96 of 1500 residues per protein pair. Almost all co-evolution-based methods have been only  
97 tested on prokaryotic lineage probably due to availability of huge number of sequences for  
98 generating variable multiple sequence alignments. Recently a hybrid method (co-evolution  
99 and machine learning based- ComplexContact<sup>21</sup>) was reported, however, its performance  
100 was also the tested on prokaryotic datasets. Overall these methods could not perform with  
101 similar accuracy when applied to eukaryotic complexes.

102 The low predictability of these methods for eukaryotic protein complexes can be attributed to  
103 the differences in the rate of evolution of the proteins in the two lineages. It has been reported  
104 that there is a difference in the composition of the type of amino acids present in prokaryotic  
105 versus eukaryotic proteins and also in the radius of gyration and planarity in the interaction  
106 interface. Since the eukaryotic proteins are not exclusive to only one set of function, it has  
107 been perceived that most of the eukaryotic protein interactions are transient, having smaller  
108 interaction hotspot zones and have more planar binding sites consisting of more polar and  
109 aromatic residues. These properties of the eukaryotic protein interactions make them essential  
110 part of cell signaling pathways<sup>24</sup>.

111 Hence to delineate the vast PPII network of eukaryote lineage, e.g. human protein interaction  
112 network, which contains about 1,50,000 interactions (with only about 10% of known  
113 structures of these protein complexes)<sup>25</sup>, it is important to develop a method specific for  
114 eukaryotic predictions. In this report, we present a new hybrid pipeline based on the  
115 framework of Co-evolution, Random forest (ML method) and Network Analysis (CoRNeA)  
116 for predicting the pairwise residues of the PPII from the protein sequence information of two  
117 interacting proteins (Figure 1). We also developed a new hybrid method for calculating co-

118 evolving positions in the interacting pairs based on mutual information and Statistical  
119 Coupling Analysis (SCA)<sup>26</sup>. Owing to high signal to noise ratio, this method in consensus  
120 with the other co-evolution-based method does not perform well independently to extract the  
121 precise interacting pair of residues especially for eukaryotic proteins. Hence, we used this  
122 method as one of the features for machine learning pipeline. The other features derived for  
123 the random forest classifier are based on the physicochemical properties of the amino acids  
124 which depend on their side chain structure such as charge, size and hydrophobe  
125 compatibility, secondary structure information and relative solvent accessibility, were also  
126 derived using amino acid sequence information. To include the energetics of interactions,  
127 contact potentials were also included as features. Similar to other machine learning  
128 classifiers, our pipeline also predicted a number of false positives. In order to reduce them we  
129 employed network analysis by incorporating the intra contact information to generate residual  
130 networks for PPII. In summary, the major highlight of this method as compared to other  
131 methods developed on the similar lines are 1) use of eukaryotic protein structure database for  
132 training the classifier. 2) use of co-evolution information as conservation-based feature. 3)  
133 use of intra contact pairs to eliminate false positive pairs through network analysis. Thus, we  
134 present a holistic approach to this complex problem of identifying pair of residues forming  
135 the interaction interface in the heterodimers from the amino acid sequence information.

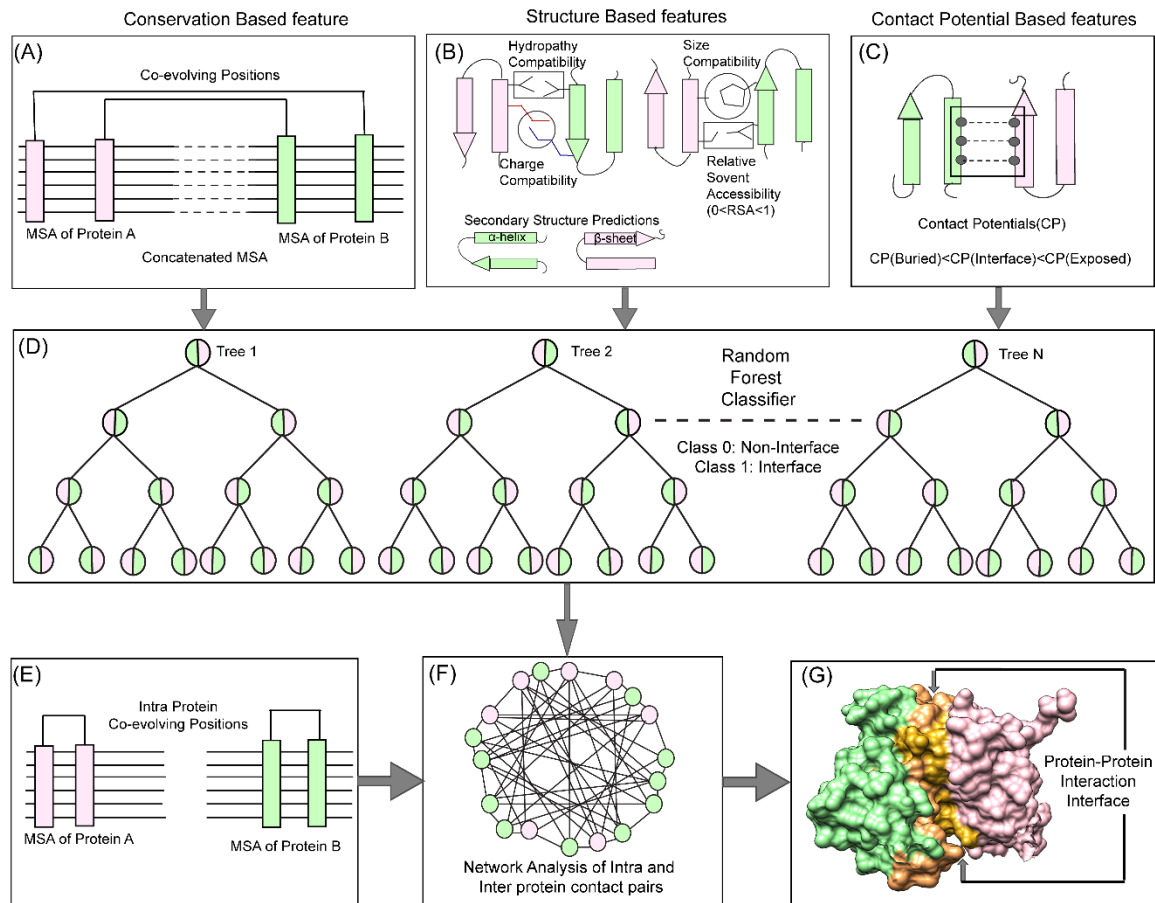

136

137 **Figure 1: CoRNéA pipeline for predicting co-evolving contact forming residues in an**  
138 **interacting pair of proteins.** The method for predicting the protein-protein interaction  
139 interface consists of three levels. The top panel depicts the features used for machine learning  
140 pipeline. (A). Conservation based (co-evolution) (B) Structure-based (Charge, Size,  
141 Hydropathy, Secondary structure, and Relative solvent accessibility) and (C) contact  
142 potential- based features (both for buried and exposed residues). (D) Random forest  
143 classification where pairwise values for both proteins are considered depicted in half green  
144 and pink circles for binary classification (Class 1: protein interface, Class 0: non-interface).  
145 The bottom panel depicts the application of network analysis by combining intra and inter  
146 protein contact predictions for reducing the false positives. (E) Prediction of intra contacts of  
147 Protein A and B. (F) Combined network analysis of inter and intra predicted contacts. (G)  
148 Interface prediction for PDB ID: 1H9D.

## 149 2. Methodology

150 The overall pipeline to predict pairwise contact forming residues from sequence derived data  
151 can be divided into three distinct parts as depicted in Figure 1. The first step is to generate

152 pairwise features (conservation, structural and contact potential based) from the amino acid  
153 sequence of the two interacting proteins (Figure 1(A)-(C)). The second step is to feed these  
154 pairwise features in a random forest classifier and hence optimize its various hyperparameters  
155 to obtain the best evaluation statistics (Figure 1(D)). The third step is to combine the intra  
156 protein contact forming residues from co-evolution-based method and inter-protein contact  
157 forming residues from random forest classifier and perform network analysis to predict the  
158 exclusive pair of residues forming the interface of the two interacting proteins (Figure 1(E)-  
159 (G)).

## 160 **2.1 Datasets**

161 The Affinity Database version 2.0<sup>27</sup> was used to select the protein complex structures for  
162 training (42 complexes were selected for training). The amino acid sequences of the complex  
163 structures were extracted from [www.rcsb.org](http://www.rcsb.org) and used as a query to search for homologs.  
164 PHMMER<sup>28</sup> was used to fetch maximum homologs of the query sequence which were then  
165 manually curated to remove redundant sequences. The sequences having less than 25%  
166 sequence identity were removed. The final dataset for each of the interacting protein  
167 consisted of identical species.

168

## 169 **2.2 Multiple Sequence Alignments**

170 The datasets for each interacting pair of proteins having identical species were subjected to  
171 structure-guided multiple sequence alignments using PROMALS3D<sup>29</sup>. The alignments were  
172 then analyzed/edited in JalView<sup>30</sup> and then concatenated (Last residue of Protein A followed  
173 by first residue of Protein B) in R using package seqinr<sup>31</sup>. These concatenated MSA datasets  
174 were used for co-evolution matrix calculations.

## 175 **2.3 Features**

176 For calculating sequence-based features, the sequences were extracted from the protein  
177 databank ([www.rcsb.org](http://www.rcsb.org)) and any missing regions reported in the structure were removed  
178 from the sequence data. All the features for training and testing were compiled as all versus  
179 all residue pairs between sequence of the interacting pair of protein (Protein A and Protein B)  
180 in form of M\*N matrix (M=length of Protein A and N= length of Protein B). All the feature  
181 values were scaled between 0 and 1. (Figure S1)

### 182 **2.3.1 Evolution based features**

#### 183 ***Co-evolution matrices (CMI)***

184 The co-evolution scores between the pair of residues of the interacting proteins were  
185 calculated based on Conditional Mutual Information as depicted in Figure 2. The  
186 concatenated MSA's were subjected to perturbation experiment similar to that used in  
187 Statistical Coupling Analysis (SCA)<sup>26</sup>. The amino acids were converted from alphabetic  
188 nomenclature to numeric for the ease of calculation (table S1). For each column in the MSA  
189 of Protein A and B, a condition pertaining to the presence of one of the 20 amino acid was  
190 given to subset the concatenated MSA. For example, position 1 in concatenated MSA, a  
191 condition given to subset the MSA for the presence of valine (V). A subset of sequences was  
192 selected which had only valine at position 1 of MSA. Frequencies of the amino acid present  
193 in the subset were calculated and subjected to the conditional mutual information formula<sup>32</sup>.  
194 It resulted in 20 such conditions for each column in the MSA of Protein A which were  
195 summed up to obtain the final co-evolution M\*N matrix.



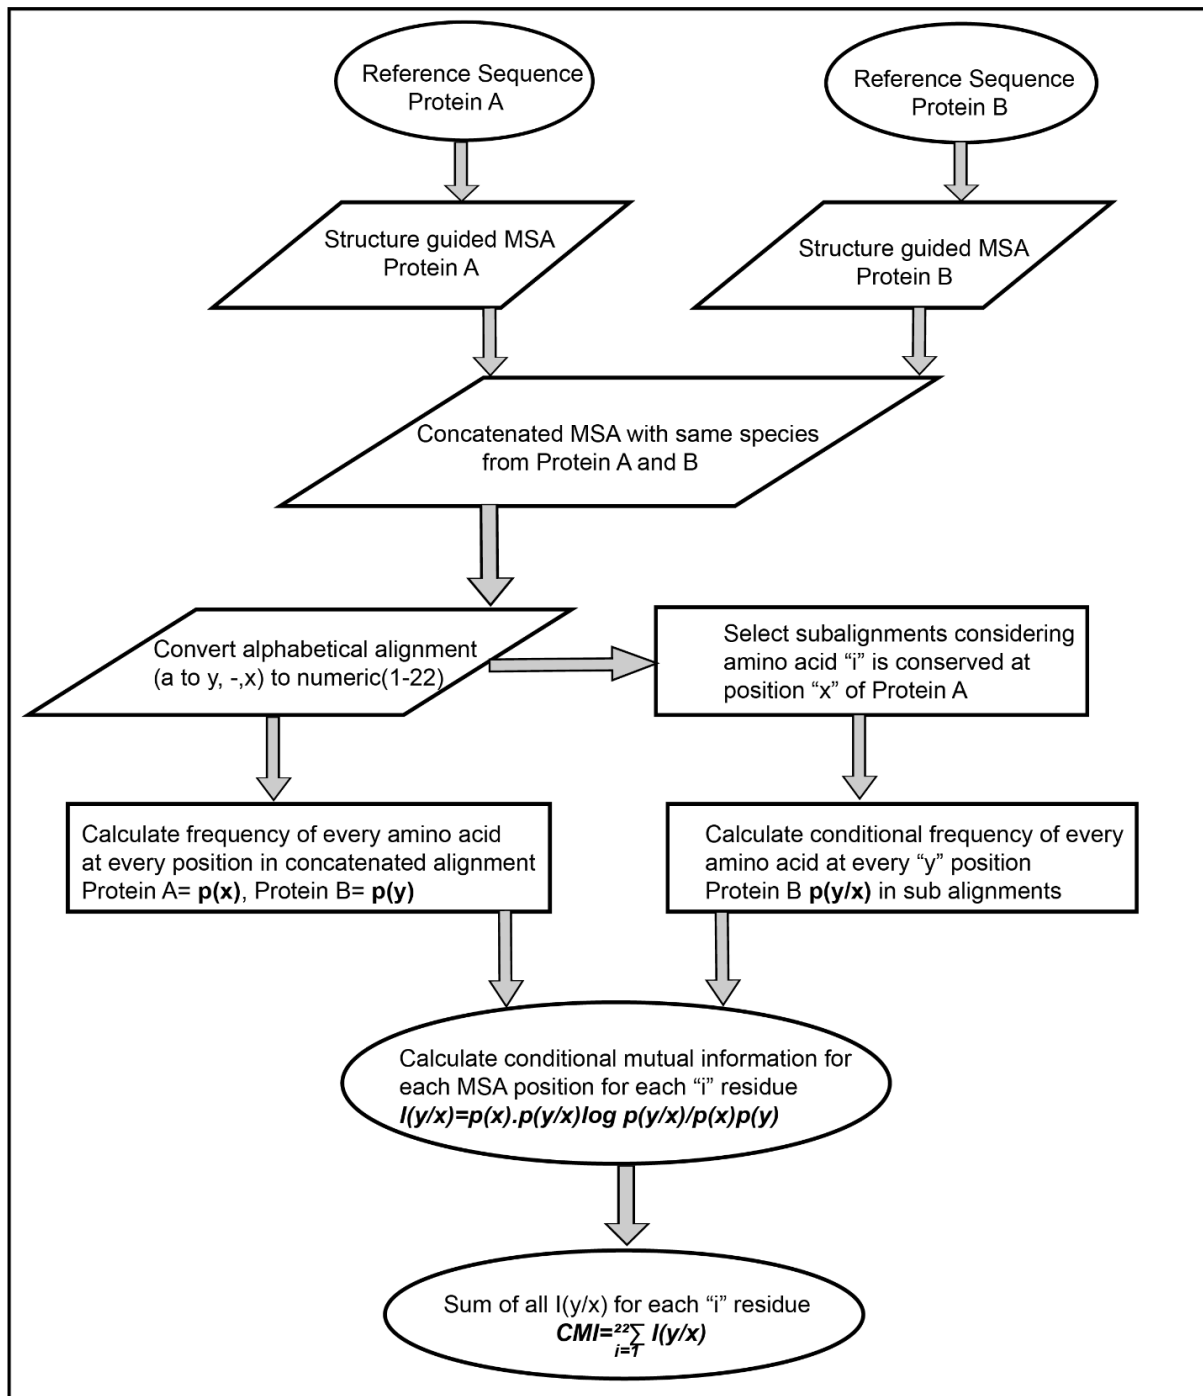

196

197 **Figure 2: Flow chart representing an algorithm for calculating inter protein co-evolving**  
 198 **positions from multiple sequence alignments.**

199 **2.3.2 Structure based features**

200 **Charge, Hydrophobe and size compatibility matrices**

201 The physicochemical properties of the residue determined by the composition and chemical  
 202 structure were used to derive the structure-based features. These features can be derived  
 203 from sequence information but to derive pair wise values for these properties, we employed

204 the 20X20 residue matrices which were described to aid in *ab initio* modeling of single  
205 protein<sup>33</sup>. These matrices were used to derive an all versus all residue matrix (M\*N) for the  
206 interacting pair of proteins as features i.e. hydropathy compatibility (HCM), charge  
207 compatibility (CCM) and size compatibility matrices (SCM)

### 208 ***Relative Solvent Accessibility (RSA)***

209 To calculate the pairwise RSA values, RSA of independent proteins were calculated using  
210 SPIDER3<sup>34</sup> and multiplied to form an all versus all (M\*N) matrix of the pair of interacting  
211 proteins.

### 212 ***Secondary Structure Predictions (SSP)***

213 The secondary structure of the proteins was predicted using PSIPRED<sup>35</sup> and all residues were  
214 assigned numbers (i.e. 1= $\alpha$ -helix, 2= $\beta$ -sheet and 3=l-loop). Simple multiplication and scaling  
215 of these numbers between 0 and 1 would yield in a combination where  $\alpha$ -helix to  $\alpha$ -helix  
216 instance will be ranked lowest. To avoid this mis scaling, the training dataset was inspected  
217 for the nature of residue-residue combinations in terms of secondary structures and the 6  
218 possible combinations (i.e.  $\alpha$ - $\alpha$ ,  $\alpha$ - $\beta$ ,  $\alpha$ -l,  $\beta$ - $\beta$ ,  $\beta$ -l and l-l) were ranked in order of occurrence.  
219 These values were then used as standard to fill in all M\*N matrices of the two interacting  
220 proteins.

### 221 ***2.3.3. Contact Potential based features***

222 Three different approximations of contact potentials were used to generate contact potential-  
223 based features. The first approximation was the original matrix (MJ matrix)<sup>36</sup> where the  
224 effective inter-residue contact energies for all amino acid pairs were calculated based on the  
225 statistical analysis of protein structures. The other two approximations were derived from the  
226 MJ matrix, where a 2-body correction was applied on this matrix to generate two separate  
227 matrices<sup>37</sup>. One of them was specific for capturing the interactions between exposed residues  
228 and the other one for buried residues. Thus, all three possible combinations were used to  
229 derive three contact potential (M\*N) matrices namely, **CP**: original MJ matrix, **CPE**: MJ  
230 matrix derived for exposed residues and **CPB**: MJ matrix derived for buried residues, for the  
231 pair of interacting proteins.

232

233

## 234 **2.4. Environment features**

235 To include residue environment information for training the machine learning algorithm, a  
236 kernel matrix of size 5\*5 was defined and convolved over the nine feature matrices as  
237 described above. The convoluted features were generated by using OpenImageR  
238 (<https://github.com/mlampros/OpenImageR>) package in R and the size of the matrices were  
239 kept same to avoid any loss of information. Additionally, various other kernel matrices were  
240 also used to train and test different datasets varying from 3\*3 to 7\*7 with varying percentage  
241 decrease in the weights from 10% to 25%. Hence, for each independent training/testing cycle,  
242 18 feature matrices were used for each pair of interacting protein for training the random  
243 forest classifier (9 original features and 9 derived features).

## 244 **2.5 Interface residue labeling**

245 The interface residues for the protein complexes were extracted using PISA<sup>38</sup>. The number of  
246 residue pairs present in the interface (500 pairs for 42 complexes) was far less than all  
247 possible residue pairs of the two interacting proteins (20,00,000 for 42 complexes). To  
248 increase the search space and take into consideration the environment of the contact forming  
249 residues, a distance cut off of 10Å was used to search for possible pair of residues flanking -2  
250 to +2 positions of the interface residues extracted from PISA. This yielded ten times more  
251 positive labels (5000 pairs for 42 complexes) for training the classifier.

## 252 **2.6 Data Imbalance Problem**

253 Although increasing the search space as explained above yielded 10 times more data points,  
254 still the complete protein complex database exhibited highly imbalanced data. 5000 pairs  
255 were labeled as positive out of the total 20,00,000 pairs. In order to address this imbalance  
256 class problem, the majority class, which was the negative data labels (non-interface residues  
257 pairs) was down sampled. A number of ratios for negative to positive samples were tested  
258 iteratively (e.g. 2:1, 5:1, 10:1 and 20:1) and best evaluation statistics were obtained when the  
259 negative sample size was five times that of positive samples (5:1). This was used as training  
260 set for the supervised classification model.

## 261 **2.7 Random Forest Classifier**

262 The random forest classifier<sup>39</sup> was trained first using a grid search to optimize the  
263 hyperparameters for the model yielding the best evaluation statistics through cross-validation.  
264 The hyperparameters obtained from the grid search were then used to train the classifier with

265 training to test sample split to 75:25. The scoring function used for optimizing the  
266 hyperparameters was chosen as F1 score owing to imbalanced nature of the dataset used for  
267 training. Scikit-learn<sup>40</sup> was used to import the random forest classifier base algorithm.  
268 Training was performed on the same data sets both with and without environment features.  
269 All the data sets were compiled using R and Rstudio( <http://www.rstudio.com/>) and machine  
270 learning was performed using python3.7 via anaconda-navigator (<https://anaconda.com>).

## 271 **2.8 Network Analysis**

272 To reduce the number of false positives obtained from the random forest classifier, a holistic  
273 approach was adopted as described in Figure 3 to include the intra protein predictions. To  
274 determine the intra contacts, we used the co-evolution method as described in 2.3.1 by  
275 concatenating Protein A with itself (similarly for Protein B) (Figure 3(B)). To determine the  
276 contact forming intra-protein residue pairs, the residues present at a sequential distance less  
277 than 5 residues were eliminated and only top 5% of the coevolution values were taken as  
278 positive. The residue pairs obtained from this analysis for both proteins were used to plot the  
279 intra-protein residue networks in Rstudio using igraph package<sup>41</sup>.

280 The predictions from the random forest classifier were used to plot the inter-protein residue  
281 network as a bipartite graph using the igraph package in Rstudio. Since the RSA for residues  
282 present in the core of the protein should be 0, these residues were extracted from SPIDER3<sup>34</sup>  
283 for both the proteins independently. A residual network was hence computed for the inter-  
284 protein contact predictions by first eliminating the nodes representing RSA=0 and then the  
285 intra-protein contacts from Protein A and B (Figure 3(C) and 3(D)).

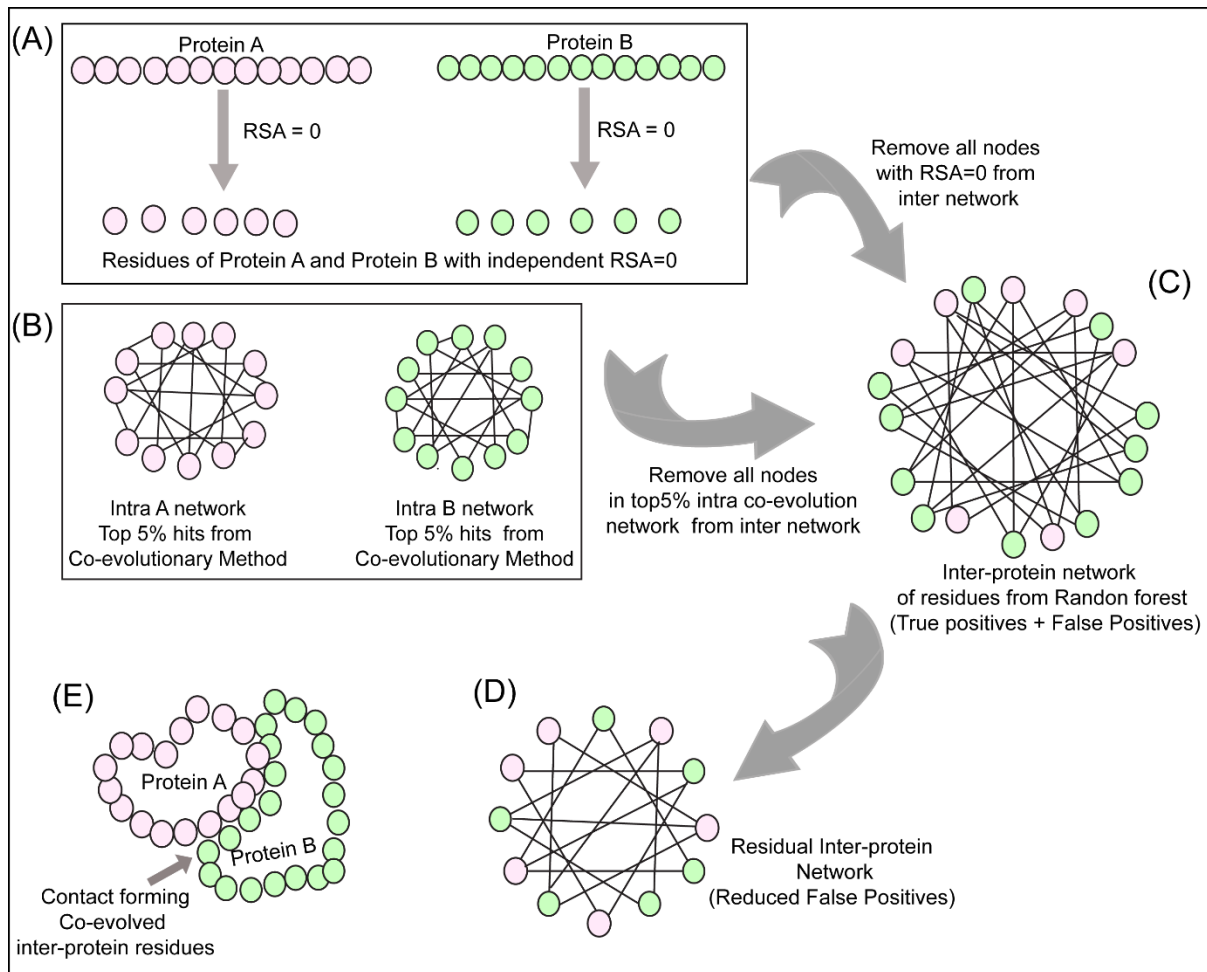

286

287 **Figure 3: Network analysis of intra and inter protein contacts.** (A) Extraction of residues  
288 with RSA=0 for Protein A and B. (B) Intra contact prediction for Protein A and B (top 5%  
289 co-evolving residue pairs). (C) Predicted inter protein network from random forest classifier.  
290 (D) The false-positive inter protein residue pairs obtained from the random forest classifier  
291 are reduced by removing nodes having RSA=0 for Protein A and B as well as top 5% co-  
292 evolving intra protein residues of Protein A and B. (E) Analysis of the inter-contact from  
293 residual network onto the structure of Protein A and B.

### 294 **2.9 Scoring of positive pairs using convolution feature matrix**

295 The residual inter-protein network obtained were then plotted as a binary matrix of Protein A  
296 versus Protein B where 0 represented predicted non interface pairs and 1 represented  
297 predicted interface pairs. To identify the most probable interaction interfaces, cluster of 1's  
298 was identified by convolving a unitary matrix of size equal to that of kernel matrix used for  
299 deriving environmental features (i.e. 3\*3 or 5\*5) over the prediction matrix. Sub sections  
300 having the maximum number of 1's hence obtained the highest score (score of 9 for 3\*3  
301 matrix and 25 for 5\*5 matrix). A cut off value of 2 for 3\*3 matrix and 6 for 5\*5 matrix was

302 selected to sort the high scoring pairs considering that at least 25% of the 3\*3 or 5\*5  
303 subsections of the prediction matrix are populated with 1's. These high scoring pairs were  
304 then extracted and mapped onto the test dataset structures to identify the true positives such  
305 that they also occur in the group of 3 residues at a stretch in both the proteins.

### 306 ***2.10 Immunoprecipitation for validating interface residues***

307 Human Nup93 (KIAA0095) fragments (full length (1-819), 1-150, 1-82, 96-150) were cloned  
308 in pEGFP-C1 expression vector (Clontech) fused with GFP at N-terminus. HEK293F cells  
309 (Invitrogen) cultured in freestyle media (Gibco) in a humidified incubator maintained with  
310 8% CO<sub>2</sub>, 37°C at 110 rpm, were transfected with plasmid DNA using Polyethylenimine  
311 (Polysciences). Cells were harvested after 60 hours and lysed with lysis buffer (1X DPBS  
312 (Gibco), 0.2% tween 20, protease inhibitor cocktail, 1mM PMSF) by incubating the cells on  
313 ice for 30 minutes followed sonication and centrifugation. 1 mg of supernatant was incubated  
314 with glutathione beads (Pierce) pre-bound with GST tagged Anti-GFP nanobody (Addgene  
315 ID # 61838)<sup>42</sup> for 4 hours and 5% lysate was taken as input. The beads were then washed  
316 with lysis buffer thrice and the pulled fractions were eluted by incubating with elution buffer  
317 (1X DPBS, 50 mM Tris Cl pH 8, 150 mM NaCl, 0.5 mM EDTA, 5 mM β-mercaptoethanol,  
318 10 mM reduced glutathione. Eluted fractions were separated on 10 % SDS PAGE, and  
319 transferred onto PVDF membrane (Millipore). Blots were then probed with primary antibody  
320 Anti-Nup205 at 1:4000 (Sigma HPA024574), Anti-GFP 1:3000 (Sigma G1546) followed by  
321 secondary HRP conjugate. Blots were developed using Quant HRP substrate (Takara) and  
322 images were acquired on Amersham Imager 600 (GE).

323

324

325

326

327

328

329

330

### 331 **3. Result and Discussion**

#### 332 **3.1 Feature Derivation**

333 The predictability of any supervised machine learning method is dependent on the nature of  
334 features used for training. Random forest classifier is a tree-structure based algorithm where  
335 the classification rules are learned based on the feature values and their target class provided  
336 while training. Various features generated for training the random forest classifier were  
337 divided into three categories viz conservation, structure-based and contact potential-based  
338 features. For the conservation-based feature, a new co-evolution algorithm was derived as  
339 explained in 2.3.1 and figure 2. The new method as described in section 2.3.1 provided better  
340 scores for the interface residues as opposed to other co-evolution methods (table S2). Another  
341 important difference was generation of only a single non-symmetric M\*N matrix from this  
342 method as opposed to LXL (where L= M+N) from other methods which result in higher  
343 signal to noise ratios. Thus, the conditional mutual information (CMI) based method was able  
344 to provide more confidence to the co-evolving pair of residues and decreasing the noise by  
345 generating the M\*N matrices. Moreover, the co-evolving pair of residues in the interacting  
346 proteins maintain the homeostasis of the interaction across species hence using them as a  
347 feature as opposed to the standard PSSM based conservation methods(such as PAIRpred<sup>9</sup>,  
348 eFindSite<sup>18</sup>, Cons-PPISP<sup>12</sup>, PSIVER<sup>20</sup>, BIPSPI<sup>19</sup>, etc.) provided better predictability.

349 The nature of physicochemical properties of the residue interaction in the protein interface is  
350 somewhere in between their properties when present in the core or on the surface of the  
351 protein. It has been reported that the interface environment is closer to that exhibited on the  
352 outside in contact with the solvent as opposed to that present in the core of the protein<sup>43</sup>. For  
353 example, relative solvent accessibility of a residue which defines its possible position in the  
354 protein i.e. whether it will be present in the core of the protein (relative solvent accessibility  
355 of 0) or is solvent-exposed (relative solvent accessibility >0). For the residues which lie in the  
356 PPI interface should have value as  $0 < RSA < 1$  if the value is scaled between 0 and 1. Due to  
357 lack of specific standard matrices for inter-protein residue contacts, those derived for intra-  
358 protein contacts were used for feature generation in this method which includes charge,  
359 hydrophobe and size compatibilities, relative solvent accessibility and secondary structure  
360 predictions.

361 The knowledge-based statistical potentials have also been used previously to mimic the  
362 interactions between the amino acids in a protein. One of such knowledge-based potential is

363 the contact potential derived by Miyazawa and Jernigan based on statistical analysis of the  
364 protein structures. These contact potentials are widely used in the computational prediction  
365 for protein folding. The contact potentials for the residue lying in the PPI interface should  
366 ideally lie in between those of buried and exposed residues. To assess their applicability in  
367 identifying interface residues of the interacting proteins three approximations of these contact  
368 potentials were used as features.

369 The contacts between two residues of the interacting proteins also depend on its neighboring  
370 residues by creating a favorable niche for the interaction to take place. Hence the properties  
371 governing the interaction (as described above) of the neighboring residues will also have an  
372 impact on the overall predictability of the random forest classifier. To address this, the  
373 random forest classifier was trained in two different modes i.e. with and without environment  
374 features, the results of which are explained below.

### 375 *3.2 Evaluation of environment features in random forest classifier*

376 To validate the effect of the environment features on the random forest classifier, the  
377 classifier was trained both with and without the environment features. The evaluation metrics  
378 obtained for both the cases are listed in supplementary table S3. The overall accuracy  
379 obtained for the dataset trained with the environment features was 85.3% as opposed to that  
380 for without environment features was 80%. The Receiver-Operator Curve and confusion  
381 matrix for five-fold cross-validation for the dataset with environment features is shown in  
382 figure 4 and that without environment is depicted in supplementary figure S2. As observed  
383 through all the evaluation statistics, the classifier predicts with better precision and recall and  
384 hence F1 measure, especially for the class label 1, when the environment features are used for  
385 training. Thus, validating that these derived features (environment features) are important in  
386 predicting the contact forming residue pairs for the interacting proteins.



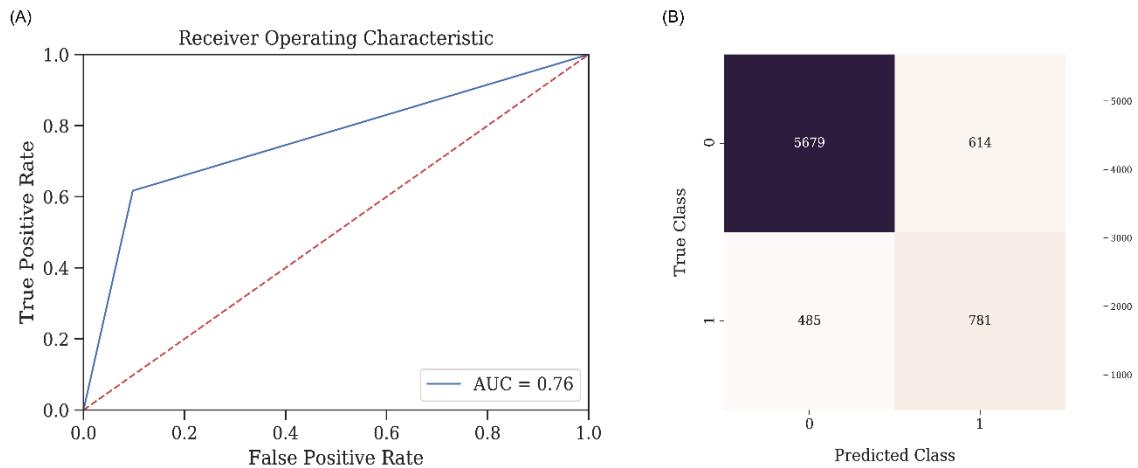

387  
388 **Figure 4: Statistics for the Random Forest Classifier Model for predicting contact**  
389 **forming residue pairs.** (A) Receiver-operator curve (ROC) depicting Area under the curve  
390 (AUC) as 0.76 when the model is tested on the 75:25 data split. (B) Confusion matrix for the  
391 tested model on 75:25 data split with a final accuracy of 85.33%

### 392 **3.3 Feature importance evaluation**

393 One of the marked features of random forest classifier is that it is able to decipher the  
394 importance of every feature used for training which can be used to determine the over-fitting  
395 of a model as well as to gain insights about the physical relevance of the features in  
396 predicting the PPI interface. The feature importance plot for the dataset without the  
397 environment features (supplementary figure S3) depicts that the three most important features  
398 are relative solvent accessibility (RSA), co-evolution scores (CMI) and the contact potentials  
399 (CP). However, the feature importance plot for the dataset with environment features (18  
400 features in all) (figure 5), depicts the importance of these derived features. Of the 18 features,  
401 used for training, top 12 positions have all 9 derived/environment features along with RSA,  
402 CMI, and CP. Thus, it is evident that all these features play a crucial role in the prediction of  
403 protein interaction interfaces.

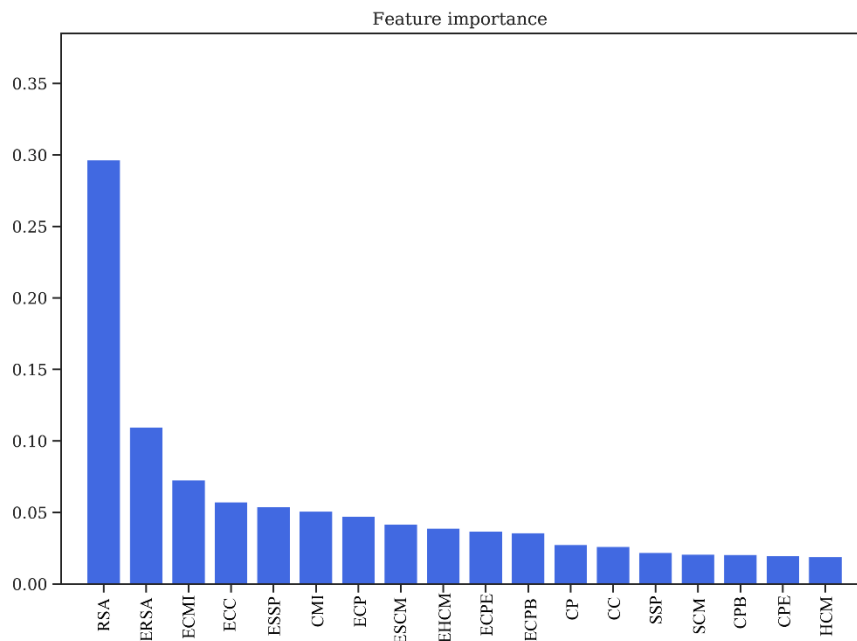

404

405 **Figure 5: Feature Importance obtained from Random Forest Classifier.**

406 Relative Solvent Accessibility (RSA/ERSA) and Co-evolution Scores (ECMI/CMI) as two of  
407 the most important features in training the model. **RSA:** Relative Solvent Accessibility.  
408 **ERSA:** Environment Relative Solvent Accessibility. **ECMI:** Environment Conditional  
409 Mutual Information. **ECC:** Environment Charge Compatibility. **ESSP:** Environment  
410 Secondary Structure Prediction. **CMI:** Conditional Mutual Information. **ECP:** Environment  
411 Contact Potential. **ESCM:** Environment Structure Compatibility Matrix. **EHCM:**  
412 Environment Hydropathy Compatibility Matrix. **ECPE:** Environment Contact Potential for  
413 Exposed residues. **ECPB:** Environment Contact Potential for Buried residues. **CP:** Contact  
414 Potential. **CC:** Charge Compatibility. **SSP:** Secondary Structure Prediction. **SCM:** Structure  
415 Compatibility Matrix. **CPB:** Contact Potential for Buried residues. **CPE:** Contact Potential  
416 for Exposed residues. **HCM:** Hydropathy Compatibility Matrix.

### 417 **3.4 Relationship between the size of feature kernel matrix and type of secondary** 418 **structures in the interaction hotspots**

419

420 The interaction interfaces of the proteins can be classified into 6 possible categories based on  
421 the secondary structure compositions of the interface hotspot regions, such as  $\alpha$ - $\alpha$ ,  $\alpha$ - $\beta$ ,  $\alpha$ -l,  $\beta$ -  
422  $\beta$ ,  $\beta$ -l and l-l (where  $\alpha$  denotes helices,  $\beta$  denoted sheets, and l denoted loops). Since the  
423 residue environment features were identified as the most critical features in the training of

424 random forest classifier model, it is important to consider the role of the size of kernel matrix  
425 used for training the classifier. The residue environment for any protein can range from n-1 to  
426 n+1 position and up to n-3 to n+3 positions, thus all such variations were tested by training  
427 different classifiers. For every different size and weight of the feature kernel matrix, the  
428 derived features were generated and used to train different random forest models. For each of  
429 the test dataset, all these different models were tested to determine a relationship between the  
430 nature of interaction in terms of secondary structure pairs and the size and weight of feature  
431 kernel matrices. The optimized models were then utilized to test for pair of interacting  
432 proteins with known crystal structure which were not a part of the training dataset to validate  
433 the predictability of the method. As observed from table S4, for interface hotspots consisting  
434 of loop-loop or loop-sheet interactions were predicted better using 5\*5 kernel matrix derived  
435 model and those consisting of helix-helix interfaces were predicted better using the 3\*3  
436 kernel matrix derived model.

### 437 **3.5. Validation of prediction onto test datasets**

438 The pipeline CoRNeA was used to test its predictability on four eukaryotic protein complexes  
439 with known crystal structures. These protein complexes were not a part of the training  
440 dataset. The combined amino acid length of the two proteins in these hetero dimers ranged  
441 from 127 amino acids to 986 amino acids. Additionally, variability in terms of secondary  
442 structure combinations in the interface were also considered while selecting these test  
443 datasets. The features for each dataset were generated as for the training dataset and different  
444 kernel matrix derived environmental feature-based models were used for predicting the  
445 interface residues for each test case. The model which predicted with the best evaluation  
446 statistics was considered for the downstream network analysis and final prediction matrix  
447 processing. Moreover, CoRNeA was used to predict the interaction interface of a known  
448 interacting pair of protein from the inner ring of the nuclear pore complex to access the  
449 applicability of the pipeline to filter high scoring pairs in absence of structural information.

#### 450 **3.5.1 Vav and Grb2 Sh3 domain heterodimer (PDB ID: 1GCQ)**

451 One of them was the crystal structure of Vav and Grb2 Sh3 domain (PDB ID: 1GCQ)<sup>44</sup>  
452 which consists of three chains. One of Vav proto-oncogene (Chain C) and the other two of  
453 growth factor receptor-bound protein 2 (Chain A and Chain B). The dataset was compiled for  
454 this protein pair using Chain A and Chain C of 1GCQ as query. The features were calculated  
455 as described above and used as test dataset for evaluating the trained random forest models

456 with environment features. The total size of the dataset created by these two chains amounted  
457 to 4002 pairs of residues. The random forest classifier predicted 25 pairs correctly as true  
458 positives and 967 pairs were predicted as false positives.

459 To further reduce the number of false-positive pairs, network analysis was performed. The  
460 intra protein contact forming residue pairs for Chain A (Protein A) and Chain C (Protein B)  
461 of 1GCQ were obtained from co-evolution analysis where only top 5% pairwise values were  
462 considered to be true cases. The length of Chain A is 56 amino acids which would lead to  
463 3,136 intra pairs. The highest scoring 157 pairs were considered while constructing the intra  
464 protein contact forming residue network of Chain A of 1GCQ as depicted in supplementary  
465 figure S4 (A). The length of Chain C is 69 amino acids which would lead to 4,761 intra  
466 protein pairs. The highest scoring 238 pairs were considered while constructing the intra  
467 protein contact forming network of Chain C of 1GCQ as depicted in figure S4(B). The inter  
468 protein contact forming residue pair network of Chain A and Chain C as obtained from  
469 random forest classifier is shown in figure S4(C) which consisted to 992 predicted pairs of  
470 which 967 were false positives. A residual network was calculated from the three networks  
471 mentioned above (as shown in Figure S4(D)) and the final pairs were plotted as a matrix of  
472 Protein A versus Protein B. Since a 5\*5 matrix was used to derive the environmental features,  
473 a unitary matrix of 5\*5 was convolved onto the resultant interface prediction matrix. Pairs  
474 having convolved value more than 6 were selected which reduced the total pairs to 359 of  
475 which 42 were true positives and 317 were false positives. The results obtained from the  
476 pipeline are shown onto the structure of Vav and Grb2 Sh3 domains (PDB ID 1GCQ) (Figure  
477 6A(i-ii)). Interestingly, the data labels provided while testing was only for Chain A and Chain  
478 C but the labels obtained after prediction were for both the pairs i.e. Chain A and Chain C  
479 (Figure 6A(i-ii)) as well as Chain B and Chain C (Figure 6A(i-ii)) (table S5) within 10Å  
480 distance. In comparison to the interface predicted by PISA using the structural information,  
481 CoRNeA was able to predict at least 50% of true pairs as depicted in figure 6A(iii). Thus, the  
482 overall pipeline to predict the PPI interface is fair in predicting the probable pairs of  
483 interacting residues as well as separate out the residue which might reside on the surface of  
484 the protein from those present in the core of the individual proteins only from amino acid  
485 sequence information. The confusion matrix before and after the network analysis is provided  
486 in supplementary table S6.

487

488 **3.5.2 Alpha gamma heterodimer of human Isocitrate dehydrogenase (IDH3) (PDB ID:**  
489 **5YVT)**

490 To test the applicability of the pipeline on larger protein complexes, the structure of the alpha  
491 gamma heterodimer of human IDH3 (PDB ID: 5YVT)<sup>45</sup> (Figure 6B) was used as a test  
492 dataset. This protein complex is from mitochondrial origin and its length (M+N) is larger  
493 (693 amino acids) as compared to the previous example (PDB ID: 1GCQ, 127 amino acids).  
494 Network analysis was performed for this dataset by calculating the intra contacts of both  
495 chains A and B. The residual network resulted in 992 edges which were then mapped back in  
496 the form of the matrix of Protein A versus Protein B. A unitary matrix of 5\*5 was convolved  
497 onto the predicted matrix and 537 pairs having value more than 6 were selected for analysis.  
498 Of these, 30 pairs formed the actual contacts when mapped onto the structure having distance  
499 within 10Å as shown in figure 6B (i-ii). Hence this new pipeline can be used for proteins  
500 from eukaryotic origin as well as the length of the pair of proteins in consideration is not a  
501 limiting factor.

502 **3.5.3 Ubiquitin like activating enzyme E1A and E1B (PDB ID: 1Y8R)**

503 The crystal structure of ubiquitin-like activating enzyme E1A and E1B (PDB ID: 1Y8R)<sup>46</sup>  
504 having a combined length of 986 amino acids (Protein A: 346 amino acids and Protein B: 640  
505 amino acids) was used as another test dataset. Network analysis was performed for this  
506 dataset by calculating the intra contacts of both chains A and B. The residual network  
507 resulted in 1166 edges which were then mapped back in the form of the matrix of Protein A  
508 versus Protein B. A unitary matrix of 3\*3 was convolved onto the predicted matrix owing to  
509 the occurrence of  $\alpha$  helical structure of the pair of proteins under consideration resulting in  
510 total number of 898 positives pairs of which 18 were true positives and remaining 880 were  
511 false positives (Figure 6C).

512 **3.5.4 Nup107-Nup133 heterodimer of the outer ring of the Nuclear Pore Complex (PDB**  
513 **ID: 3CQC)**

514 The crystal structure of Nup107-Nup133 complex (Nup107: 270 amino acids, Nup133: 227  
515 amino acids, combined length of 497 amino acids) consists of the C-terminal region of both  
516 the proteins was used as another test dataset. The residual network consisting of 540 pairs  
517 was generated after removing the nodes which are a part of the intra network in either of the  
518 proteins. The total number of points were further reduced to 240 after performing convolution  
519 on the final prediction matrix using a unitary 3\*3 matrix and keeping a cut off of more than 2.

520 Of the 240 pairs, 6 pairs were identified as true positives within the distance of 10Å (Figure  
521 6D).

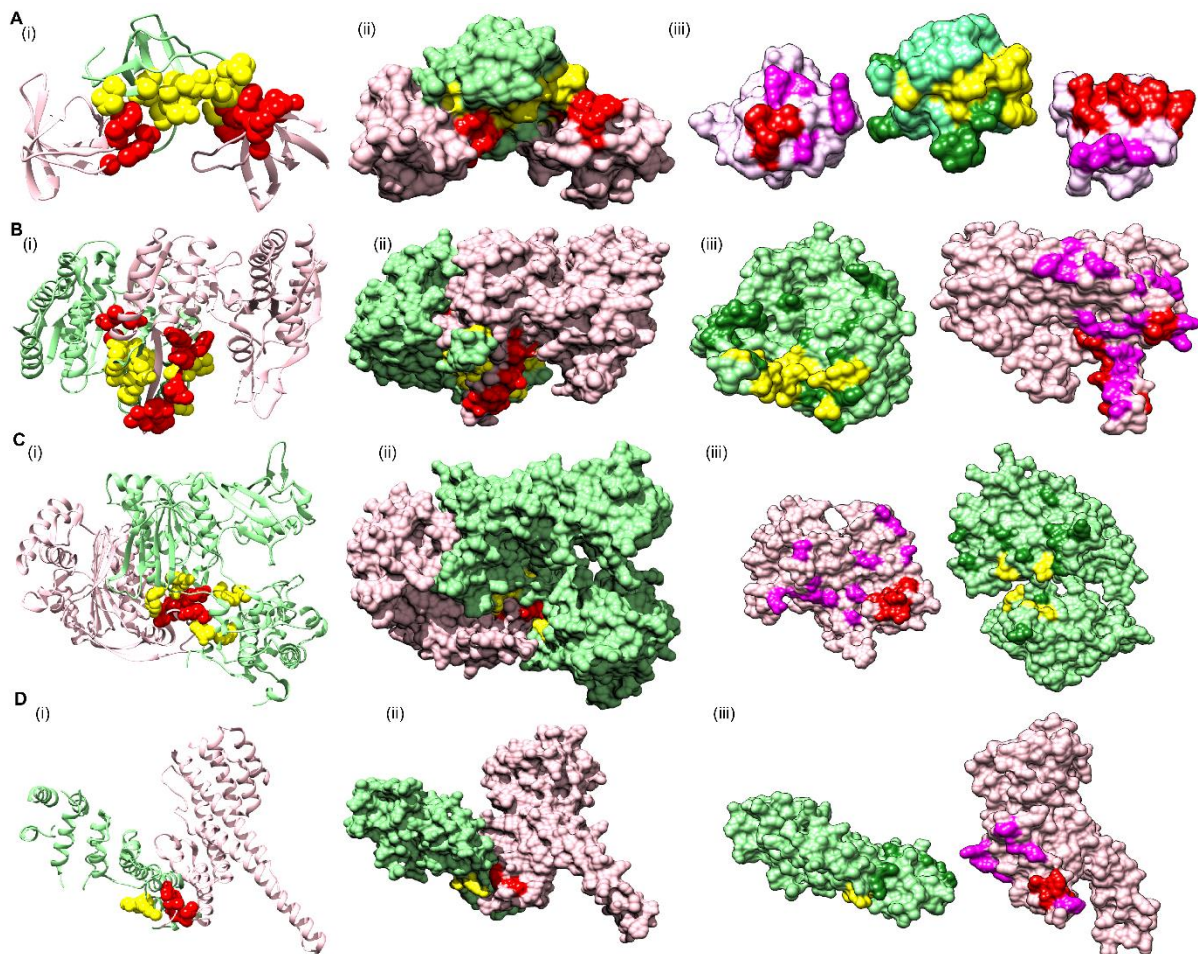

522

523 **Figure 6: Prediction of interface hotspots on test datasets using CoRNeA.**

524 Predictions of the interface residues for 4 test datasets were mapped onto their crystal  
525 structures, A. PDB ID: 1GCQ B. PDB ID: 5YVT, C. PDB ID: 1Y8R, D. PDB ID: 3CQC.  
526 The first column (i) for all four datasets depict ribbon representation where Protein A is  
527 colored in pink and Protein B in light green; interface residues predicted using CoRNeA for  
528 Protein A (red) and Protein B (yellow) are depicted as spheres. The second column (ii)  
529 depicts surface representation of the same. The third column (iii) depicts open book  
530 representation of the interface residues where the interface hotspots predicted by PISA and  
531 not by CoRNeA are colored as purple for Protein A and forest green for Protein B.

532

533

### 534 **3.5.5 Nup93-Nup205 complex of the adapter ring of the Nuclear Pore Complex (NPC)**

535 To test the applicability of the pipeline on the dataset without known structural information,  
536 hNup93-hNup205 interaction interface was explored. Nup93 is a linker protein of the Nup93-  
537 subcomplex of the NPC. It is known to connect the adaptor/ inner ring of the spoke region  
538 with the central channel pore of the NPC<sup>47</sup>. The adaptor region consists of the four proteins  
539 viz., Nup188, Nup205, Nup35, and Nup155. In terms of the known interactions of the  
540 specific domains of the Nup93, its R1 region which spans the first 82 amino acids is known  
541 to interact with the Nup62 of the central channel<sup>48</sup>. Nup93 is specifically known to form  
542 mutually exclusive complexes with either Nup188 or Nup205 of the adapter ring<sup>49,50</sup>. The  
543 interaction interface information for these pair of proteins is not known specifically from  
544 mammalian origin owing to difficulties in biochemical reconstitution of these complexes.  
545 However, for hNup93-hNup205, proximity information for this pair of proteins is known  
546 through crosslinking based mass spectrometry analysis<sup>51</sup>. The cross-linking data suggests  
547 three different regions of Nup93 to be in proximity of Nup205 (i.e. N-terminal, middle and C-  
548 terminal) but the most prominent hits are seen between the R2 (96-150) region at the N-  
549 terminal of Nup93 with the C-terminal of Nup205 (Figure 7A).

550 CoRNeA was employed to identify the interaction interface of Nup93-Nup205 complex by  
551 utilizing full length sequence information of both the proteins (Nup93: 819 amino acids and  
552 Nup205: 2012 amino acids). Since, the secondary structure prediction of both these proteins  
553 depicts  $\alpha$ - helices, hence the 3\*3 kernel matrix derived random forest model was utilized to  
554 predict the interface pairs. The resultant high scoring pairs, which pertained to specifically  
555 the R2 region of Nup93 (96-150) with the C-terminal region of Nup205 obtained from  
556 CoRNeA (Figure 7B), are in consensus with cross-linking mass spectrometry analysis (table  
557 S7). However various low scoring pairs were also identified for Nup93 middle and C-  
558 terminal region but they did not span more than three continuous pairs (such as 89-91 of  
559 Nup93 with 1201-1205 of Nup205) between the two proteins.

560 Further, validation of the interacting interface between Nup93 and Nup205 predicted with  
561 CoRNeA analysis was done by *in-vitro* pull-down experiment using Nup93 deletion  
562 constructs (Figure 7C). Upon pull down with GST tagged anti-GFP nanobody, N-terminal  
563 region of Nup93(1-150) was able to pull endogenous Nup205 efficiently. Further mapping  
564 the minimal interaction region, R2 fragment of Nup93 (96-150) was found to interact with  
565 endogenous Nup205 thus validating the *in-silico* prediction by CoRNeA. A diminished

566 interaction of the Nup93 region (176-819) was also observed through this pull-down  
 567 experiment which is also consistent with the identification of low scoring regions identified  
 568 by CoRNeA. This experimental validation depicts that CoRNeA is able to predict the short  
 569 stretches of interaction hotspots between known pair of interacting proteins from only their  
 570 sequence information and hence can be used to decipher the minimal interacting regions of  
 571 pair of large proteins. Thus, aiding in their biochemical reconstitution followed by structural  
 572 elucidation.

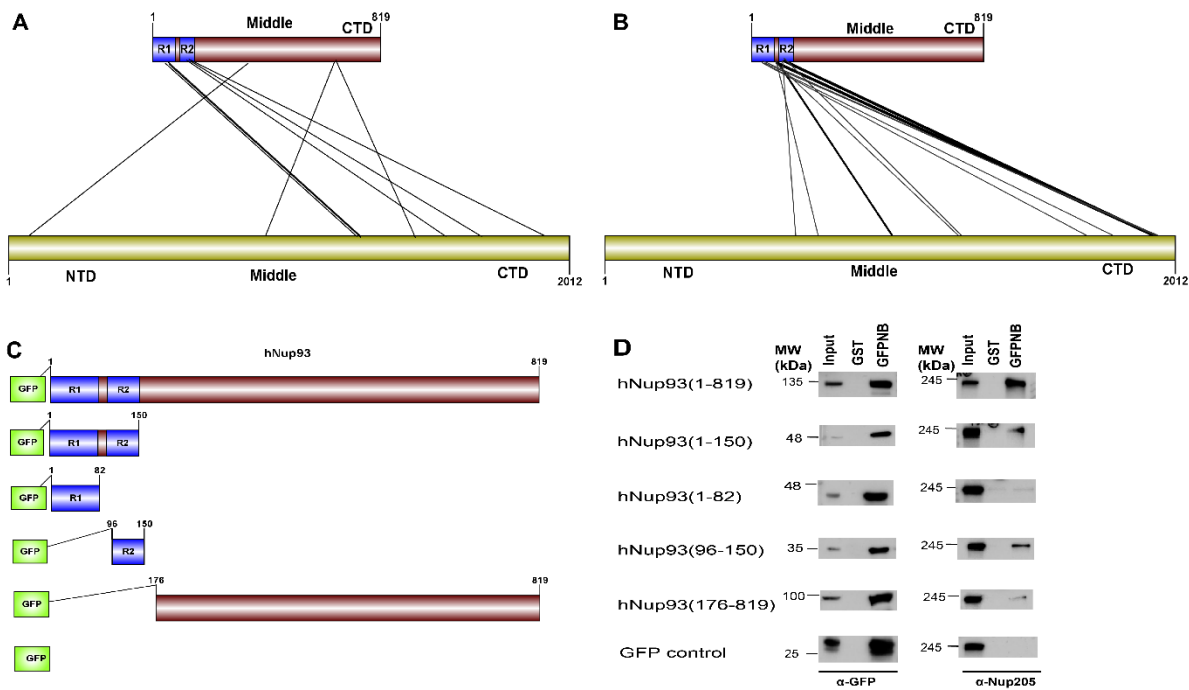

573

## 574 Figure 7: Prediction and validation of interface regions for Nup93-Nup205

575 A. Cross-linking based mass spectrometry defined proximity regions between Nup93-  
 576 Nup205 (adapted from Jan Kosinski, et.al, Science, 2016). B. Top 10% regions predicted by  
 577 CoRNeA. Edges in bold depict three most significant regions (N-terminal of Nup93 with C-  
 578 terminal of Nup205) (details in table S7). C. GFP-fused deletion constructs for Nup93 for  
 579 validating the predictions. D. Immunoprecipitation results depicting N-terminal region (1-  
 580 150) and R2 regions (96-150) of Nup93 specifically interact with endogenous Nup205.  
 581 GFPNB: GST-anti-GFP-nanobody.

## 582 3.6. Comparison with other methods/BIPSPI

583 To assess the predictability of CoRNeA, the results obtained from it for the two test cases  
 584 described above were compared to the predictions of recently published method BIPSPI<sup>19</sup>



585 which is closest to our implementation and the only available method to predict the interface  
 586 residues using only amino acid sequence information. BIPSPI also utilizes similar  
 587 physiochemical properties as well as residue environment information through hot encodings.  
 588 Although the major point of difference between BIPSPI and CoRNeA lies choice of  
 589 conservation-based feature (PSSM in BIPSPI versus co-evolution in CoRNeA) and derivation  
 590 of the environmental features (hot encoding in BIPSPI versus convolution averaging in  
 591 CoRNeA). Moreover, the network analysis post processing of the results to remove the intra  
 592 contacts is one of the unique attributes of the pipeline CoRNeA which is not present with  
 593 other machine learning based methods known for predicting the interaction interfaces. Since  
 594 CoRNeA utilizes only the amino acid sequence information, the sequence mode of prediction  
 595 on BIPSPI server was employed for predicting the interface residues of the four test datasets  
 596 (PDB ID: 1GCQ, 5YVT, 1Y8R and 3CQC). The Nup93-Nup205 dataset could not be  
 597 processed using BIPSPI owing to its limitation to consider proteins larger than 1500 amino  
 598 acids in length. The results obtained for these datasets depicted that the final predictions from  
 599 CoRNeA yielded in fewer false positives than BIPSPI hence validating the overall  
 600 improvement in the accuracy of the prediction of PPI interface residues (Table 1).

601 **Table 1: Comparison of predictions from CoRNeA with BIPSPI**

| Test Dataset        | Method | Expected no of residues within 10Å | Number of True positives with probability more than 0.5 | Number of False Positives with probability more than 0.5 |
|---------------------|--------|------------------------------------|---------------------------------------------------------|----------------------------------------------------------|
| <b>PDB ID: 1GCQ</b> | BIPSPI | 108                                | 0                                                       | N/A                                                      |
|                     | CoRNeA |                                    | 42                                                      | 317                                                      |
| <b>PDB ID: 5YVT</b> | BIPSPI | 164                                | 24                                                      | 1210                                                     |
|                     | CoRNeA |                                    | 30                                                      | 537                                                      |
| <b>PDB ID: 1Y8R</b> | BIPSPI | 157                                | 1                                                       | 57                                                       |
|                     | CoRNeA |                                    | 18                                                      | 880                                                      |
| <b>PDB ID: 3CQC</b> | BIPSPI | 48                                 | 0                                                       | 1                                                        |
|                     | CoRNeA |                                    | 6                                                       | 240                                                      |

602 The numbers depicted for CoRNeA are post convolution of prediction matrix. For 1GCQ the total  
 603 number of expected contacts and true positives are for both chain combinations i.e. Chain A and C;  
 604 Chain B and C

605 CoRNeA can, however, be further optimized to reduce the false-positive rates as well as  
606 improve the true positive predictions by increasing the training dataset. As it is evident that  
607 the environmental features play a very important role in training the classifier and there is a  
608 correlation between the type of secondary structures and kernel matrices used to derive these  
609 environmental features, different training sub-datasets can be used to train specifically on  
610 various combinations of secondary structures to decrease the false positive prediction by  
611 random forest classifiers and hence increase the specificity of the overall pipeline.

## 612 **Conclusions**

613 Predicting the pairwise interacting residues for any two-given pair of proteins from only the  
614 amino acid sequence still remains a challenging problem. In this study, the newly designed  
615 pipeline CoRNeA addresses some of the challenges for predicting the PPI interfaces such as  
616 applicability to eukaryotic PPI and high false-positive rates, by incorporating co-evolution  
617 information and intra contacts for improving the precision and recall of the pipeline. This  
618 pipeline can be utilized to predict the interface residues as a pairwise entity and also to  
619 understand folding of the individual proteins through intra contact predictions. Obtaining the  
620 structural information of proteins individually as well as in complex with their interacting  
621 partners is a tremendously challenging problem especially for large multimeric complexes.  
622 CoRNeA can be utilized to identify the minimal interacting regions in the heterodimers for its  
623 biochemical reconstitution, which can then be utilized in structure elucidation studies. The  
624 information obtained from CoRNeA can also be used as a starting point for protein docking  
625 studies in cases where 3D structure models (experimental or homology-based) are available.  
626 The web server is currently under development and the R codes along with the trained  
627 models are available on github.

## 628 **Author Contributions**

629 KC and RC conceived the project. KC performed all computational analysis. BB performed  
630 the pull-down experiment. SCM contributed for intellectual suggestions for the project. KS  
631 and AKK helped in the optimization of machine learning algorithm. The manuscript was  
632 written by KC and RC. All authors read and approved the manuscript.

## 633 **Acknowledgments**

634 This work is supported by Department of Science and Technology-Science and Engineering  
635 Research Board grant (SERB/EMR/2017/000272) and Department of Biotechnology grant

636 (DBT/PR26398/BRB/10/1637/2017) to RC, DST-Inspire SRF fellowship to KC and DBT-  
637 SRF fellowship to BB. AKK and KS acknowledge financial support from a Raja Ramanna  
638 Fellowship awarded by Department of Atomic Energy (10/1(16)/2016/RRF-R&D-II/630).  
639 We would like to thank all members of Lab of Structural Biology at NCCS for help and  
640 support through discussions on this manuscript. We would also like to thank Professor Ninan  
641 Sajeeth Philip (Department of Physics, St. Thomas College, Kozhencherry, Kerala, India),  
642 Dr Sheelu Abraham (Marthoma College, Chungathara, Nilambur, Kerala, India) and Dr  
643 Kaustabh Vaghmare (Inter University Centre for Astronomy and Astrophysics, Pune,  
644 Maharashtra, India) for their inputs for machine learning part.

## 645 **References**

- 646 1. Uetz P, Giot L, Cagney G, et al. A comprehensive analysis of protein-protein  
647 interactions in *Saccharomyces cerevisiae*. *Nature*. 2000;403(6770):623-627.  
648 doi:10.1038/35001009
- 649 2. Masters SC. Co-Immunoprecipitation from Transfected Cells. In: Fu H, ed. *Methods*  
650 *Mol Biol*. Totowa, NJ: Humana Press; 2004:337-350. doi:10.1385/1-59259-762-9:337
- 651 3. Sobott F, Robinson C V. Protein complexes gain momentum. *Curr Opin Struct Biol*.  
652 2002;12(6):729-734. doi:10.1016/S0959-440X(02)00400-1
- 653 4. Zhang QC, Deng L, Fisher M, Guan J, Honig B, Petrey D. PredUs: A web server for  
654 predicting protein interfaces using structural neighbors. *Nucleic Acids Res*.  
655 2011;39(SUPPL. 2):283-287. doi:10.1093/nar/gkr311
- 656 5. Xue LC, Dobbs D, Honavar V. HomPPI: A class of sequence homology based protein-  
657 protein interface prediction methods. *BMC Bioinformatics*. 2011;12.  
658 doi:10.1186/1471-2105-12-244
- 659 6. Jordan RA, EL-Manzalawy Y, Dobbs D, Honavar V. Predicting protein-protein  
660 interface residues using local surface structural similarity. *BMC Bioinformatics*.  
661 2012;13(1):41. doi:10.1186/1471-2105-13-41
- 662 7. Porollo A, Meller J. Prediction-Based Fingerprints of Protein-Protein Interactions.  
663 *PROTEINS Struct Funct Bioinforma*. 2007;66(2006):630-645. doi:10.1002/prot.21248
- 664 8. Liang S, Zhang C, Liu S, Zhou Y. Protein binding site prediction using an empirical  
665 scoring function. *Nucleic Acids Res*. 2006;34(13):3698-3707. doi:10.1093/nar/gkl454

- 666 9. Minhas F ul AA, Geiss BJ, Ben-Hur A. PAIRpred: Partner-specific prediction of  
667 interacting residues from sequence and structure. *Proteins Struct Funct Bioinforma.*  
668 2014;82(7):1142-1155. doi:10.1002/prot.24479
- 669 10. Kufareva I, Budagyan L, Raush E, Totrov M, Abagyan R. PIER: Protein Interface  
670 Recognition for Structural Proteomics. *PROTEINS Struct Funct Bioinforma.*  
671 2007;67:400-417. doi:DOI: 10.1002/prot.21233
- 672 11. Neuvirth H, Raz R, Schreiber G. ProMate: A structure based prediction program to  
673 identify the location of protein-protein binding sites. *J Mol Biol.* 2004;338(1):181-199.  
674 doi:10.1016/j.jmb.2004.02.040
- 675 12. Chen H, Zhou HX. Prediction of interface residues in protein-protein complexes by a  
676 consensus neural network method: Test against NMR data. *Proteins Struct Funct*  
677 *Genet.* 2005;61(1):21-35. doi:10.1002/prot.20514
- 678 13. Qin S, Zhou HX. Meta-PPISP: A meta web server for protein-protein interaction site  
679 prediction. *Bioinformatics.* 2007;23(24):3386-3387.  
680 doi:10.1093/bioinformatics/btm434
- 681 14. de Vries SJ, Bonvin AMJJ. Cport: A consensus interface predictor and its performance  
682 in prediction-driven docking with HADDOCK. *PLoS One.* 2011;6(3).  
683 doi:10.1371/journal.pone.0017695
- 684 15. Vries SJ de, Dijk ADJ van, Bonvin AMJJ. WHISCY: What Information Does Surface  
685 Conservation Yield? Application to Data-Driven Docking. *PROTEINS Struct Funct*  
686 *Bioinforma.* 2006;63:479-489. doi:DOI: 10.1002/prot.20842
- 687 16. Negi SS, Schein CH, Oezguen N, Power TD, Braun W. InterProSurf: a web server for  
688 predicting interacting sites on protein Surfaces. *Bioinformatics.* 2007;23(24):3397-  
689 3399. doi:10.1093/bioinformatics/btm474.InterProSurf
- 690 17. Segura J, Jones PF, Fernandez-Fuentes N. Improving the prediction of protein binding  
691 sites by combining heterogeneous data and Voronoi diagrams. *BMC Bioinformatics.*  
692 2011;12. doi:10.1186/1471-2105-12-352
- 693 18. Maheshwari S, Brylinski M. Template-based identification of protein-protein  
694 interfaces using eFindSitePPI. *Methods.* 2016;93:64-71.  
695 doi:10.1016/j.ymeth.2015.07.017

- 696 19. Sanchez-Garcia R, Sorzano COS, Carazo JM and, Segura J. BIPSPI: a method for the  
697 prediction of Partner- Specific Protein-Protein Interfaces. *Bioinformatics*.  
698 2019;35(3):470-477. doi:10.1093/bioinformatics/xxxxxx
- 699 20. Murakami Y, Mizuguchi K. Applying the Naïve Bayes classifier with kernel density  
700 estimation to the prediction of protein-protein interaction sites. *Bioinformatics*.  
701 2010;26(15):1841-1848. doi:10.1093/bioinformatics/btq302
- 702 21. Zeng H, Wang S, Zhou T, et al. ComplexContact: A web server for inter-protein  
703 contact prediction using deep learning. *Nucleic Acids Res*. 2018;46(W1):W432-W437.  
704 doi:10.1093/nar/gky420
- 705 22. Weigt M, White RA, Szurmant H, Hoch JA, Hwa T. Identification of direct residue  
706 contacts in protein–protein interaction by message passing. *Proc Natl Acad Sci U S A*.  
707 2009;106(1):67-72.
- 708 23. Hopf TA, Schärfe CPI, Rodrigues JPGLM, et al. Sequence co-evolution gives 3D  
709 contacts and structures of protein complexes. *Elife*. 2014;3:1-45.  
710 doi:10.7554/elife.03430
- 711 24. Goncarenco A, Shaytan AK, Shoemaker BA, Panchenko AR. Structural Perspectives  
712 on the Evolutionary Expansion of Unique Protein-Protein Binding Sites. *Biophys J*.  
713 2015;109(6):1295-1306. doi:10.1016/j.bpj.2015.06.056
- 714 25. Rodriguez-Rivas J, Marsili S, Juan D, Valencia A. Conservation of coevolving protein  
715 interfaces bridges prokaryote–eukaryote homologies in the twilight zone. *Proc Natl*  
716 *Acad Sci*. 2016;113(52):15018-15023. doi:10.1073/pnas.1611861114
- 717 26. Lockless SW, Ranganathan R. Evolutionarily Conserved Pathways of Energetic  
718 Connectivity in Protein Families. *Science (80- )*. 2002;286(5438):295-299.  
719 doi:10.1126/science.286.5438.295
- 720 27. Kastritis PL, Moal IH, Hwang H, et al. A structure-based benchmark for protein-  
721 protein binding affinity. *Protein Sci*. 2011;20(3):482-491. doi:10.1002/pro.580
- 722 28. Finn RD, Clements J, Arndt W, et al. HMMER web server: 2015 Update. *Nucleic*  
723 *Acids Res*. 2015;43(W1):W30-W38. doi:10.1093/nar/gkv397
- 724 29. Pei J, Kim BH, Grishin N V. PROMALS3D: A tool for multiple protein sequence and  
725 structure alignments. *Nucleic Acids Res*. 2008;36(7):2295-2300.

- 726 doi:10.1093/nar/gkn072
- 727 30. Waterhouse AM, Procter JB, Martin DMA, Clamp M, Barton GJ. Jalview Version 2-A  
728 multiple sequence alignment editor and analysis workbench. *Bioinformatics*.  
729 2009;25(9):1189-1191. doi:10.1093/bioinformatics/btp033
- 730 31. Gouy M, Milleret F, Mugnier C, Jacobzone M, Gautier C. ACNUC: a nucleic acid  
731 sequence data base and analysis system. *Nucleic Acids Res*. 1984;12(1Part1):121-127.  
732 doi:10.1093/nar/12.1Part1.121
- 733 32. Wyner AD. A definition of conditional mutual information for arbitrary ensembles. *Inf*  
734 *Control*. 1978;38(1):51-59. doi:10.1016/S0019-9958(78)90026-8
- 735 33. Biro JC. Amino acid size, charge, hydrophathy indices and matrices for protein  
736 structure analysis. *Theor Biol Med Model*. 2006;3(1):1-12. doi:10.1186/1742-4682-3-  
737 15
- 738 34. Heffernan R, Yang Y, Paliwal K, Zhou Y. Capturing non-local interactions by long  
739 short-term memory bidirectional recurrent neural networks for improving prediction of  
740 protein secondary structure, backbone angles, contact numbers and solvent  
741 accessibility. *Bioinformatics*. 2017;33(18):2842-2849.  
742 doi:10.1093/bioinformatics/btx218
- 743 35. Jones DT. Protein secondary structure prediction based on position-specific scoring  
744 matrices. *J Mol Biol*. 1999;292:195-202. doi:10.1006/jmbi.1999.3091
- 745 36. Miyazawa S, Jernigan RL. Residue-Residue Potentials with a Favorable Contact Pair  
746 Term and an Unfavorable High Packing Density Term, for Simulation and Threading -  
747 1-s2.0-S002228369690114X-main.pdf. *J Mol Biol*. 1996:623-644. [http://ac.els-  
748 cdn.com.cuhsl.creighton.edu/S002228369690114X/1-s2.0-S002228369690114X-  
749 main.pdf?\\_tid=24355ac2-9cdb-11e2-9995-  
750 00000aab0f6c&acdnat=1365047759\\_ff446b9f5d285ed566bab28b5354da32](http://ac.els-cdn.com.cuhsl.creighton.edu/S002228369690114X/1-s2.0-S002228369690114X-main.pdf?_tid=24355ac2-9cdb-11e2-9995-00000aab0f6c&acdnat=1365047759_ff446b9f5d285ed566bab28b5354da32).
- 751 37. Zeng H, Liu K-S, Zheng W-M. The Miyazawa-Jernigan Contact Energies Revisited.  
752 *Open Bioinforma J*. 2012;6(1):1-8. doi:10.2174/1875036201206010001
- 753 38. Krissinel E, Henrick K. Inference of Macromolecular Assemblies from Crystalline  
754 State. *J Mol Biol*. 2007;372(3):774-797. doi:10.1016/j.jmb.2007.05.022
- 755 39. Breiman L. Random Forests. *Mach Learn*. 2001;45(1):5-32.

- 756 doi:10.1023/A:1010933404324
- 757 40. Pedregosa F, Varoquaux G, Gramfort A, et al. Scikit-learn: Machine Learning in  
758 Python. *J Mach Learn Res.* 2011;12:2825-2830. doi:10.1007/s13398-014-0173-7.2
- 759 41. Csárdi G, Nepusz T. The igraph software package for complex network research.  
760 *InterJournal , Complex Syst.* 2006;1695. doi:10.3724/SP.J.1087.2009.02191
- 761 42. Katoh Y, Nozaki S, Hartanto D, Miyano R, Nakayama K. Architectures of  
762 multisubunit complexes revealed by a visible immunoprecipitation assay using  
763 fluorescent fusion proteins. *J Cell Sci.* 2015;128(12):2351-2362.  
764 doi:10.1242/jcs.168740
- 765 43. Jones S, Thornton JM. PROTEIN-PROTEIN INTERACTIONS: A REVIEW OF  
766 PROTEIN DIMER STRUCTURES. *Prog Biophys molec Biol.* 1995;63(94):31-65.  
767 doi:10.1016/0079-6107(94)00008-W
- 768 44. Nishida M, Nagata K, Hachimori Y, et al. Novel recognition mode between Vav and  
769 Grb2 SH3 domains. *EMBO J.* 2001;20(12):2995-3007. doi:10.1093/emboj/20.12.2995
- 770 45. Liu Y, Hu L, Ma T, Yang J, Ding J. Insights into the inhibitory mechanisms of NADH  
771 on the  $\alpha\gamma$  heterodimer of human NAD-dependent isocitrate dehydrogenase. *Sci Rep.*  
772 2018;8(1):1-12. doi:10.1038/s41598-018-21584-7
- 773 46. Lois LM, Lima CD. Structures of the SUMO E1 provide mechanistic insights into  
774 SUMO activation and E2 recruitment to E1. 2005;24(3):439-451.  
775 doi:10.1038/sj.emboj.7600552
- 776 47. Benjamin V, Wolfram A. The diverse roles of the Nup93/Nic96 complex proteins –  
777 structural scaffolds of the nuclear pore complex with additional cellular functions. *Biol*  
778 *Chem.* 2014;395:515. doi:10.1515/hsz-2013-0285
- 779 48. Sachdev R, Sieverding C, Flotenmeyer M, Antonin W. The C-terminal domain of  
780 Nup93 is essential for assembly of the structural backbone of nuclear pore complexes.  
781 *Mol Biol Cell.* 2011;23(4):740-749. doi:10.1091/mbc.e11-09-0761
- 782 49. Vincent Galy, Iain W. Mattaj and PA. Caenorhabditis elegans Nucleoporins Nup93  
783 and Nup205 Determine the Limit of Nuclear Pore Complex Size Exclusion In Vivo.  
784 *Mol Biol Cell.* 2003;14(December):5104–5115. doi:10.1091/mbc.E03

- 785 50. Theerthagiri G, Eisenhardt N, Schwarz H, Antonin W. The nucleoporin Nup188  
786 controls passage of membrane proteins across the nuclear pore complex. *J Cell Biol.*  
787 2010;189(7):1129 LP - 1142. doi:10.1083/jcb.200912045
- 788 51. Kosinski J, Mosalaganti S, Von Appen A, et al. Molecular architecture of the inner  
789 ring scaffold of the human nuclear pore complex. *Science (80- )*. 2016;352(6283):363-  
790 365. doi:10.1126/science.aaf0643
- 791
- 792
- 793
- 794
- 795
- 796
- 797
- 798
- 799
- 800
- 801
- 802
- 803
- 804
- 805
- 806
- 807
- 808
- 809



810 **Supplementary Material**

811 **CoRNeA: A pipeline to decrypt the inter protein interfaces from amino acid sequence**  
812 **information**

813 Kriti Chopra<sup>1</sup>, Bhawna Burdak<sup>1</sup>, Kaushal Sharma<sup>2</sup>, Ajit K. Kembavi<sup>2</sup>, Shekhar C. Mande<sup>3</sup>  
814 and Radha Chauhan<sup>1\*</sup>

815 1- National Centre for Cell Science, Pune.

816 2- Inter University Centre for Astronomy and Astrophysics, Pune

817 3- Council of Scientific and Industrial Research (CSIR), New Delhi

818 **\*Corresponding Author:**

819 Dr. Radha Chauhan, Scientist 'E', National Centre for Cell Science, S.P. Pune University  
820 Campus, Ganeshkhind, Pune 411007, Maharashtra, India.

821 Email: [radha.chauhan@nccs.res.in](mailto:radha.chauhan@nccs.res.in)

822 Phone: +91-20-25708255

823

824

825

826

827

828

829

830

831

832

833

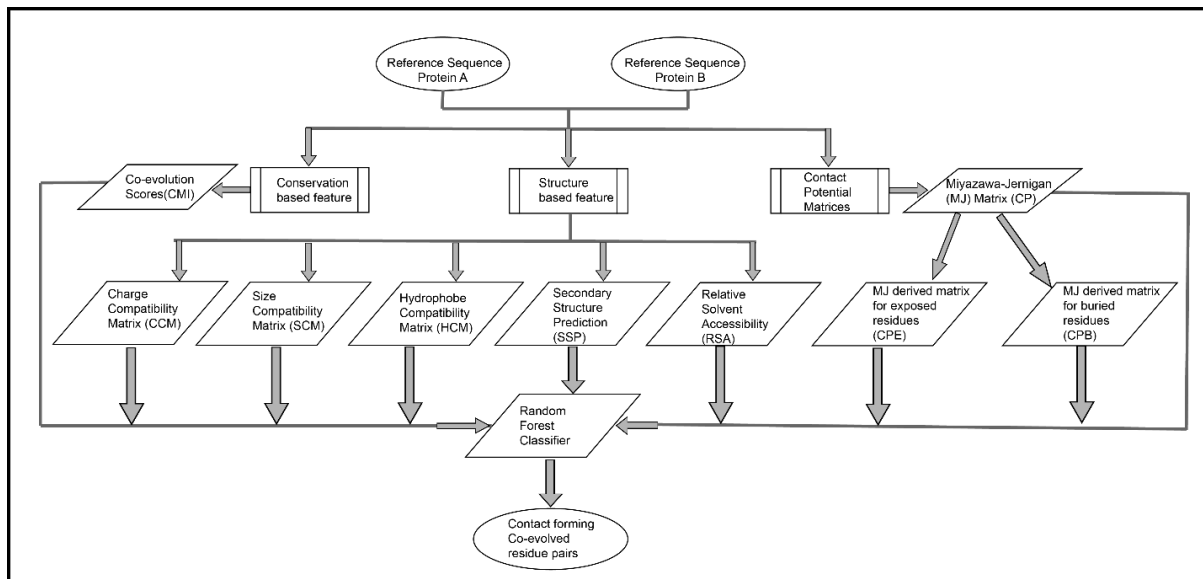

834

835 **Figure S1: Flowchart depicting the feature generation for predicting pair of protein-**  
 836 **protein interaction interface residues**

837 **Table S1: Numeric Coding for amino acids used for co-evolution score calculations**

| Amino Acid                  | Numeric Coding |
|-----------------------------|----------------|
| V (Valine)                  | 1              |
| I (Isoleucine)              | 2              |
| L (Leucine)                 | 3              |
| M (Methionine)              | 4              |
| F (Phenylalanine)           | 5              |
| W (Tryptophan)              | 6              |
| Y (Tyrosine)                | 7              |
| S (Serine)                  | 8              |
| T (Threonine)               | 9              |
| N (Asparagine)              | 10             |
| Q (Glutamine)               | 11             |
| H (Histidine)               | 12             |
| K (Lysine)                  | 13             |
| R (Arginine)                | 14             |
| D (Aspartic Acid)           | 15             |
| E (Glutamic acid)           | 16             |
| A (Alanine)                 | 17             |
| G (Glycine)                 | 18             |
| P (Proline)                 | 19             |
| C (Cysteine)                | 20             |
| - (Gap)                     | 21             |
| X (Non-Standard Amino Acid) | 22             |

838

839 **Table S2: Comparison of known methods for PPI interface prediction with the new**  
 840 **hybrid method**

| Interface residues (PISA) |              |             | Various algorithms for finding contacts |                |                   |               |                            |
|---------------------------|--------------|-------------|-----------------------------------------|----------------|-------------------|---------------|----------------------------|
| Nup107                    | Nup133       | Distance(Å) | MI<br>(2.03)                            | DCA<br>(0.158) | Eifold<br>(0.155) | SCA<br>(3.86) | New Method (CMI)<br>(1.00) |
| <b>D 879</b>              | <b>T 696</b> | 3.37        | 0.4285                                  | 0.0022         | 0.0052            | 0.618         | <b>0.804</b>               |
| <b>S 822</b>              | <b>K 975</b> | 2.78        | 0.2379                                  | 0.0009         | 0.0023            | 0.1607        | <b>0.591</b>               |
| <b>E 884</b>              | <b>K 975</b> | 2.69        | 0.2379                                  | 0.0001         | 0.0021            | 0.339         | <b>0.524</b>               |
| <b>D 917</b>              | <b>K 966</b> | 2.53        | 0.0104                                  | 0.0005         | 0.0013            | 0.192         | <b>0.642</b>               |
| <b>Y 921</b>              | <b>K 966</b> | 3.37        | 0.225                                   | 0.0008         | 0.003             | 0.616         | <b>0.364</b>               |
| <b>E 922</b>              | <b>R 962</b> | 3.18        | 0.7898                                  | 0.0015         | 0.002             | 0.742         | <b>0.342</b>               |
| <b>K 894</b>              | <b>D 982</b> | 3.82        | 0.354                                   | 0.005          | 0.0005            | 0.223         | <b>0.371</b>               |
| <b>R 898</b>              | <b>A 980</b> | 3.28        | 0.179                                   | 0.001          | 0.0025            | 0.039         | <b>0.233</b>               |
| <b>Q 902</b>              | <b>Q 944</b> | 3.35        | 0.8474                                  | 0.002          | 0.001             | 1.46          | <b>0.159</b>               |

841 The interface residues for a test case as predicted by PISA. The value under the name of the method  
 842 represents the highest score calculated by the algorithm. MI: Mutual information, DCA: Direct  
 843 Coupling Analysis, SCA: Statistical Coupling Analysis.

844

845

846

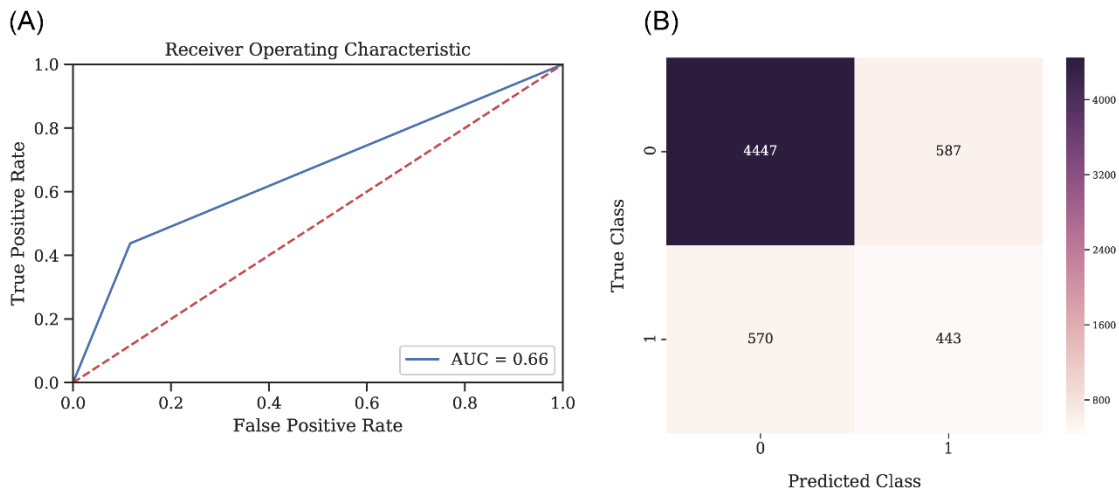

847

848 **Figure S2: Statistics for the Random Forest Classifier Model for predicting contact**  
 849 **forming residue pairs without environmental features.** (A) Receiver-operator curve  
 850 (ROC) depicting Area under the curve (AUC) as 0.66 when the model is tested on the 75:25  
 851 data split. (B) Confusion matrix for the tested model on 75:25 data split with a final accuracy  
 852 of 80%

853

854

855 **Table S3: Comparison of evaluation statistics, with and without environmental features.**

|                                       | Class               | Precision   | Recall      | F1-score    |
|---------------------------------------|---------------------|-------------|-------------|-------------|
| <b>Without Environmental Features</b> | <b>0</b>            | <b>0.89</b> | <b>0.88</b> | <b>0.88</b> |
|                                       | <b>1</b>            | <b>0.43</b> | <b>0.44</b> | <b>0.43</b> |
|                                       | <b>Weighted Avg</b> | <b>0.81</b> | <b>0.81</b> | <b>0.81</b> |
| <b>With Environmental Features</b>    | <b>0</b>            | <b>0.92</b> | <b>0.91</b> | <b>0.91</b> |
|                                       | <b>1</b>            | <b>0.56</b> | <b>0.59</b> | <b>0.58</b> |
|                                       | <b>Weighted Avg</b> | <b>0.86</b> | <b>0.85</b> | <b>0.86</b> |

856

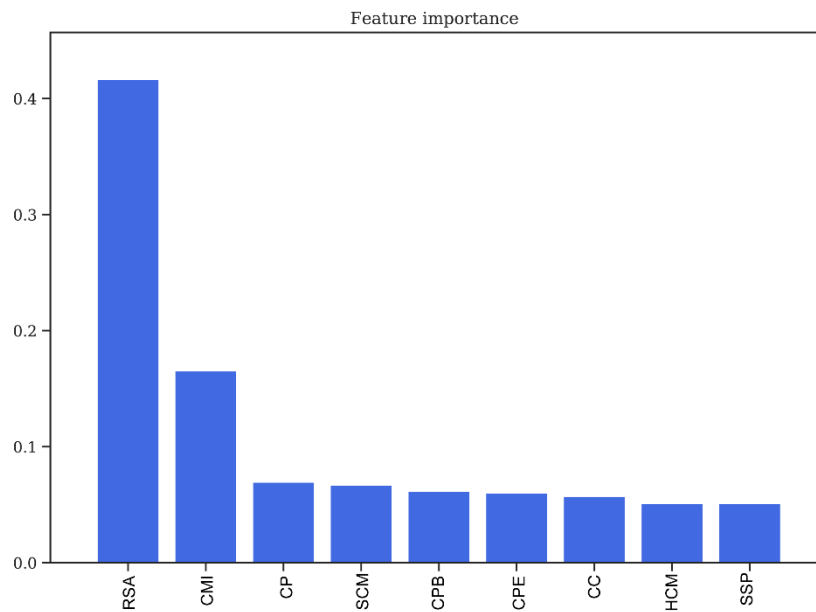

857

858

859 **Figure S3: Feature Importance obtained from Random Forest Classifier without**  
 860 **environmental features.**

861 Relative Solvent Accessibility (RSA) and Co-evolution Scores (CMI) as two of the most  
 862 important features in training the model. **RSA:** Relative Solvent Accessibility. **CMI:**  
 863 Conditional Mutual Information. **CP:** Contact Potential. **SCM:** Structure Compatibility  
 864 Matrix. **CPB:** Contact Potential for Buried residues. **CPE:** Contact Potential for Exposed  
 865 residues. **CC:** Charge Compatibility. **HCM:** Hydropathy Compatibility Matrix. **SSP:**  
 866 Secondary Structure Prediction.

867 **Table S4: Evaluation of different kernel matrix derived random forest classifier on**  
 868 **different test datasets**

| PDB ID | Type of secondary structure             | Best Kernel Matrix | Number of true positive labelled | Actual true positives predicted with best kernel matrix |
|--------|-----------------------------------------|--------------------|----------------------------------|---------------------------------------------------------|
| 1GCQ   | Loop:Loop<br>Loop:Sheet                 | 5*5                | 81                               | 25                                                      |
| 1Y8R   | Helix:Helix<br>Loop:Loop                | 3*3                | 157                              | 23                                                      |
| 4YDU   | Helix:Helix                             | 3*3                | 86                               | 23                                                      |
| 5YVT   | Helix:Helix<br>Sheet:Sheet<br>Loop:Loop | 5*5                | 164                              | 64                                                      |
| 3CQC   | Helix:Helix                             | 3*3                | 48                               | 13                                                      |

869

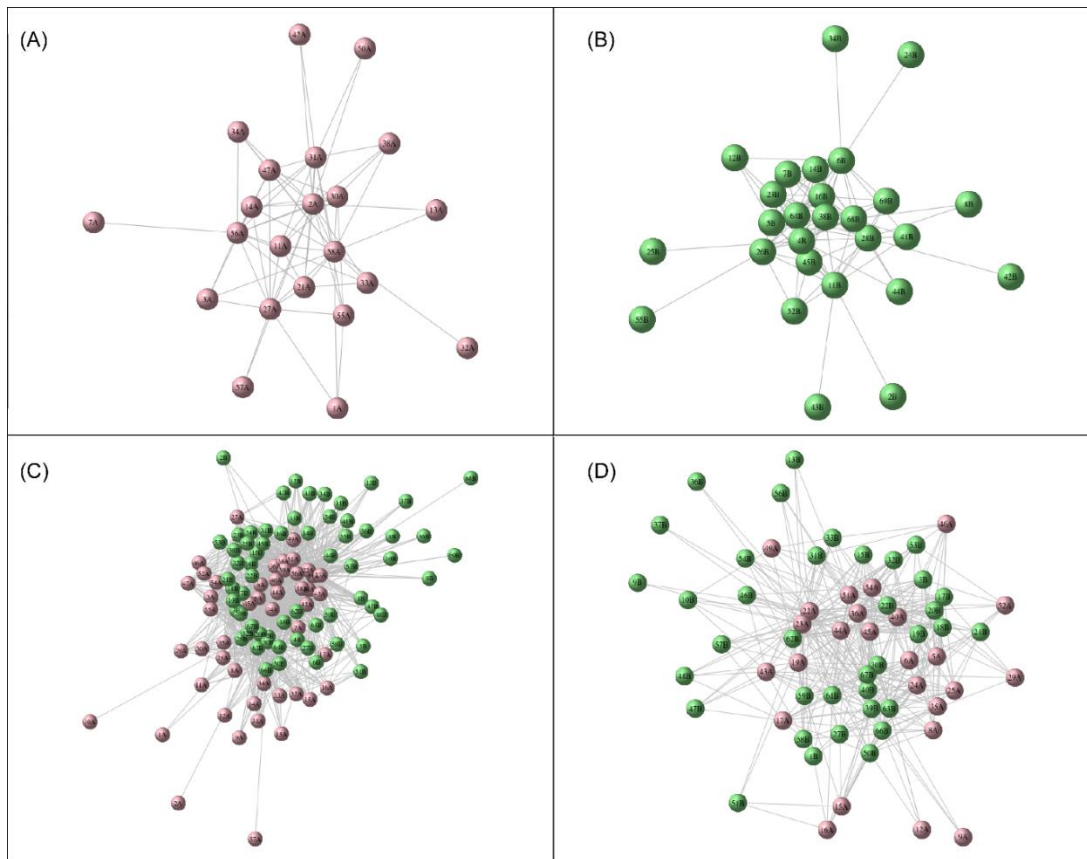

870

871 **Figure S4: Network analysis for PDB ID 1GCQ.** (A) Intra-protein network for Chain A/B  
872 of 1GCQ obtained from top 5% co-evolving intra residue pairs. (B) Intra-protein network for  
873 Chain C of 1GCQ obtained from top 5% co-evolving intra residue pairs. (C) Inter-protein  
874 network for 1GCQ obtained from random forest classifier. (D) Inter-protein network for  
875 1GCQ after removing intra-protein network nodes and all nodes having relative solvent  
876 accessibility as 0.

877

878

879

880

881

882

883

884 **Table S5: Pairwise true contacts predicted for PDB ID 1GCQ Chain A with Chain C**  
885 **and Chain B with Chain C within a distance cutoff of 10 Å.**

| Residue number<br>(Chain A) | Residue number<br>(Chain C) | Convolution Value | Distance (Å) | Residue number<br>(Chain B) | Residue number<br>(Chain C) | Convolution Value | Distance (Å) |
|-----------------------------|-----------------------------|-------------------|--------------|-----------------------------|-----------------------------|-------------------|--------------|
| 208                         | 612                         | 7                 | 3.53         | 179                         | 652                         | 7                 | 3.3          |
| 192                         | 611                         | 7                 | 3.6          | 165                         | 655                         | 8                 | 4.66         |
| 208                         | 611                         | 8                 | 3.62         | 179                         | 655                         | 9                 | 6.7          |
| 194                         | 608                         | 7                 | 3.7          | 164                         | 657                         | 7                 | 7.2          |
| 209                         | 607                         | 8                 | 3.7          | 179                         | 653                         | 7                 | 7.5          |
| 209                         | 610                         | 11                | 3.9          | 179                         | 654                         | 8                 | 8.9          |
| 193                         | 610                         | 9                 | 4            | 179                         | 629                         | 8                 | 9.8          |
| 193                         | 611                         | 7                 | 4.17         |                             |                             |                   |              |
| 208                         | 610                         | 9                 | 4.39         |                             |                             |                   |              |
| 209                         | 609                         | 11                | 4.78         |                             |                             |                   |              |
| 165                         | 608                         | 7                 | 4.8          |                             |                             |                   |              |
| 209                         | 611                         | 9                 | 4.9          |                             |                             |                   |              |
| 209                         | 608                         | 9                 | 5.13         |                             |                             |                   |              |
| 207                         | 611                         | 8                 | 5.2          |                             |                             |                   |              |
| 209                         | 651                         | 7                 | 6.8          |                             |                             |                   |              |
| 164                         | 607                         | 9                 | 7.15         |                             |                             |                   |              |
| 193                         | 609                         | 9                 | 7.3          |                             |                             |                   |              |
| 207                         | 610                         | 9                 | 7.47         |                             |                             |                   |              |
| 164                         | 608                         | 11                | 7.49         |                             |                             |                   |              |
| 179                         | 606                         | 9                 | 7.6          |                             |                             |                   |              |
| 192                         | 609                         | 9                 | 7.7          |                             |                             |                   |              |
| 209                         | 612                         | 7                 | 7.8          |                             |                             |                   |              |
| 179                         | 607                         | 12                | 8.5          |                             |                             |                   |              |
| 165                         | 609                         | 8                 | 8.7          |                             |                             |                   |              |
| 193                         | 608                         | 7                 | 8.8          |                             |                             |                   |              |
| 165                         | 610                         | 7                 | 8.9          |                             |                             |                   |              |
| 209                         | 653                         | 7                 | 9.3          |                             |                             |                   |              |
| 192                         | 608                         | 7                 | 9.6          |                             |                             |                   |              |
| 179                         | 608                         | 12                | 9.8          |                             |                             |                   |              |

886

887

888

889

890

891

892 **Table S6: Confusion Matrix statistics for PDB ID 1GCQ before and after network**  
 893 **analysis**

|                                        |                   |          |                             |                              |
|----------------------------------------|-------------------|----------|-----------------------------|------------------------------|
| <b>Before<br/>Network<br/>Analysis</b> | <b>True Class</b> | <b>0</b> | <b>True Negatives= 2954</b> | <b>False Positives = 967</b> |
|                                        |                   | <b>1</b> | <b>False Negatives= 56</b>  | <b>True Positives= 25</b>    |
|                                        |                   | <b>0</b> | <b>Predicted Class</b>      | <b>1</b>                     |
| <b>After<br/>Network<br/>Analysis</b>  | <b>True Class</b> | <b>0</b> | <b>True Negatives= 3575</b> | <b>False Positives = 317</b> |
|                                        |                   | <b>1</b> | <b>False Negatives= 56</b>  | <b>True Positives= 42</b>    |
|                                        |                   | <b>0</b> | <b>Predicted Class</b>      | <b>1</b>                     |

894

895 **Table S7: Top 10% pairs predicted for Nup93-Nup205**

| <b>Nup205</b> | <b>Nup93</b> | <b>Convolution<br/>Score</b> | <b>No of pairs in the predicted<br/>regions</b> |
|---------------|--------------|------------------------------|-------------------------------------------------|
| 1932-1936     | 86-99        | 272                          | 57                                              |
| 1932-1936     | 101-117      | 234                          | 54                                              |
| 1013-1014     | 86-109       | 100                          | 30                                              |
| 1945-1948     | 44-48        | 82                           | 16                                              |
| 1801-1805     | 44-48        | 71                           | 15                                              |
| 749-751       | 86-97        | 66                           | 18                                              |
| 1935-1939     | 448-452      | 65                           | 16                                              |
| 1928-1930     | 87-94        | 65                           | 17                                              |
| 682-684       | 109-115      | 63                           | 21                                              |
| 1937-1940     | 44-48        | 63                           | 14                                              |
| 1696-1700     | 44-48        | 59                           | 15                                              |
| 1250-1252     | 87-93        | 55                           | 17                                              |
| 1250-1252     | 109-113      | 45                           | 15                                              |

896

897
